# Supplementary material for: Introduction of the HAM-Nat examination – applicants and students admitted to the Medical Faculty in 2012-2014
Source: GMS Z Med Ausbild. 2015 Nov 16;32(5):Doc53. doi: 10.3205/zma000995 (PMC4647160; doi:10.3205/zma000995)
Supplement: Questionnaire in German (Fragebogen zur "Qualitätsverbesserung des Verfahrens zur Auswahl von Studienplatzbewerbern der Medizinischen Fakultät" (QUAMED)) [file ZMA-32-53-s-001.pdf]

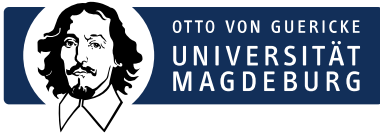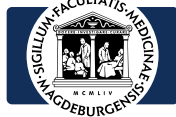

MEDIZINISCHE FAKULTÄT  
UNIVERSITÄTSKLINIKUM MAGDEBURG A.Ö.R.

## **Fragebogen zur „Qualitätsverbesserung des Verfahrens zur Auswahl von Studienplatzbewerbern der Medizinischen Fakultät“ (QUAMED)**

Liebe Studentinnen und Studenten,

herzlich willkommen an der Medizinischen Fakultät der Otto-von-Guericke-Universität Magdeburg!

Um Sie auch in Zukunft angemessen beraten und auch das Auswahlverfahren optimieren zu können, möchten wir Sie bitten, den Fragebogen auszufüllen. Uns interessieren Ihre Kriterien, die Sie bewogen haben, an unserer Fakultät Humanmedizin zu studieren.

Nehmen Sie sich bitte die Zeit, den Fragebogen zu beantworten. Wählen Sie die Antwortvorgaben aus, die Ihren persönlichen Erfahrungen und Ihren eigenen Ansichten am nächsten kommen.

Ihre Angaben werden völlig anonym behandelt. Selbstverständlich ist Ihre Teilnahme an der Erhebung freiwillig. Die Studierenden, die bereits Ihre Einwilligung an der Teilnahme an dem Forschungsvorhaben zur Qualitätsverbesserung des Verfahrens zur Auswahl von Studienplatzbewerbern im Rahmen des Auswahlverfahrens der Hochschule (HAM-Nat) gegeben haben, werden am Ende des Fragebogen gebeten, Ihre Matrikel-Nummer anzugeben.

Prof. Dr. med. C. H. Lohmann  
Studiendekan der Medizinischen Fakultät

### 1. In welchem Jahr haben Sie die Hochschulreife erworben?

☐ 2013   ☐ 2012   ☐ 2011   ☐ 2010   ☐ 2009   ☐ 2008   ☐ 2007   ☐ 2006   ☐ 2005   ☐ 2004

☐ anderes Jahr:

### 2. In welchem Bundesland haben Sie die Hochschulreife erworben? Oder war das im Ausland?

- |                                              |                                                 |                                             |
|----------------------------------------------|-------------------------------------------------|---------------------------------------------|
| <input type="checkbox"/> Baden-Württemberg   | <input type="checkbox"/> Bayern                 | <input type="checkbox"/> Berlin             |
| <input type="checkbox"/> Brandenburg         | <input type="checkbox"/> Bremen                 | <input type="checkbox"/> Hamburg            |
| <input type="checkbox"/> Hessen              | <input type="checkbox"/> Mecklenburg-Vorpommern | <input type="checkbox"/> Niedersachsen      |
| <input type="checkbox"/> Nordrhein-Westfalen | <input type="checkbox"/> Rheinland-Pfalz        | <input type="checkbox"/> Saarland           |
| <input type="checkbox"/> Sachsen             | <input type="checkbox"/> Sachsen-Anhalt         | <input type="checkbox"/> Schleswig-Holstein |
| <input type="checkbox"/> Thüringen           | <input type="checkbox"/> Ausland                | <input type="checkbox"/> Sonstiges          |

### 3. Mit welcher Durchschnittsnote haben Sie die Hochschulreife erworben?

Tragen Sie in die obere Zeile die Einerstelle ein und in die untere die Zehntelstelle ein.

**Beispiel 1:** Wenn Ihre Durchschnittsnote z.B. 1,0 ist,  
kreuzen Sie oben x1 und unten x0 an.

**Beispiel 2:** Wenn Ihre Durchschnittsnote z.B. 2,3 ist,  
kreuzen Sie oben x2 und unten x3 an.

|       |                          |                          |                          |                          |                          |                          |                          |                          |                          |                          |
|-------|--------------------------|--------------------------|--------------------------|--------------------------|--------------------------|--------------------------|--------------------------|--------------------------|--------------------------|--------------------------|
| 1er   | <input type="checkbox"/> |
| 0.1er | <input type="checkbox"/> |
|       | x0                       | x1                       | x2                       | x3                       | x4                       | x5                       | x6                       | x7                       | x8                       | x9                       |

### 4. Welches Profil verfolgte die Ausbildungsstätte, in der Sie die Hochschulzugangsberechtigung erworben haben?

- |                                                              |                                                                       |
|--------------------------------------------------------------|-----------------------------------------------------------------------|
| <input type="checkbox"/> naturwissenschaftlich/ technisch    | <input type="checkbox"/> sprachlich                                   |
| <input type="checkbox"/> sportlich/ musisch/ künstlerisch    | <input type="checkbox"/> alternativ pädagogisch (Waldorf, Montessori) |
| <input type="checkbox"/> evangelisch/ katholisch/ ökumenisch | <input type="checkbox"/> kein spezielles Profil                       |

### 5. In welchen Kursen haben Sie Ihre Hochschulreife abgelegt?

1. Leistungskurs:

2. Leistungskurs:

1. Grundkurs:

2. Grundkurs:

01 Deutsch/Literatur  
02 Englisch  
03 Französisch  
04 andere neue Sprachen  
05 Latein  
06 Griechisch  
07 Kunst/Musik  
08 anderes sprachlich-literarisch-  
künstlerisches Fach  
09 Mathematik  
10 Informatik  
11 Physik  
12 Chemie

13 Biologie  
14 Technologie/Technik  
15 anderes mathematisch-  
naturwissenschaftliches Fach  
16 Erdkunde/Geographie  
17 Geschichte/Gemeinschaftskunde  
18 Wirtschafts-/Sozialwissenschaften  
19 Erziehungswissenschaft, Philosophie  
künstlerisches Fach  
20 anderes gesellschafts-/sozialwissen-  
schaftliches Fach  
21 Sport  
22 Religion

## 6. Nach welchem Kriterium haben Sie Ihre Leistungskurse ausgewählt?

|                                                   | trifft<br>überhaupt<br>nicht zu | trifft<br>wenig<br>zu    | teils/<br>teils          | trifft<br>ziemlich<br>zu | trifft<br>völlig<br>zu   | keine<br>Angabe          |
|---------------------------------------------------|---------------------------------|--------------------------|--------------------------|--------------------------|--------------------------|--------------------------|
| Erreichung der bestmöglichen Abiturnote           | <input type="checkbox"/>        | <input type="checkbox"/> | <input type="checkbox"/> | <input type="checkbox"/> | <input type="checkbox"/> | <input type="checkbox"/> |
| Interesse am Inhalt des Faches                    | <input type="checkbox"/>        | <input type="checkbox"/> | <input type="checkbox"/> | <input type="checkbox"/> | <input type="checkbox"/> | <input type="checkbox"/> |
| gute Vorbereitung auf das zukünftige Studium      | <input type="checkbox"/>        | <input type="checkbox"/> | <input type="checkbox"/> | <input type="checkbox"/> | <input type="checkbox"/> | <input type="checkbox"/> |
| Empfehlung durch Angehörige/Bekannte              | <input type="checkbox"/>        | <input type="checkbox"/> | <input type="checkbox"/> | <input type="checkbox"/> | <input type="checkbox"/> | <input type="checkbox"/> |
| fachliche Unterstützung durch Angehörige/Bekannte | <input type="checkbox"/>        | <input type="checkbox"/> | <input type="checkbox"/> | <input type="checkbox"/> | <input type="checkbox"/> | <input type="checkbox"/> |
| vorgegebenes Angebot der Ausbildungsstätte        | <input type="checkbox"/>        | <input type="checkbox"/> | <input type="checkbox"/> | <input type="checkbox"/> | <input type="checkbox"/> | <input type="checkbox"/> |

## 7. Bitte nennen Sie uns Ihre zuletzt ausgeübte Tätigkeit direkt vor der Aufnahme des Studiums.

- |                                                                               |                                             |                                                       |
|-------------------------------------------------------------------------------|---------------------------------------------|-------------------------------------------------------|
| <input type="checkbox"/> Erwerb der Hochschulreife                            | <input type="checkbox"/> anderes Studium    | <input type="checkbox"/> Berufsausbildung/ -tätigkeit |
| <input type="checkbox"/> Zivil-, Wehrdienst, Soziales Jahr, Ökologisches Jahr | <input type="checkbox"/> Auslandsaufenthalt | <input type="checkbox"/> Sonstiges                    |

## 8. Besitzen Sie Vorerfahrungen im medizinischen Bereich (Mehrfachnennungen möglich)?

- |                                                                   |                                                         |
|-------------------------------------------------------------------|---------------------------------------------------------|
| <input type="checkbox"/> Nein                                     | <input type="checkbox"/> Ja, im Rahmen von Praktika     |
| <input type="checkbox"/> Ja, im Rahmen eines Freiwilligendienstes | <input type="checkbox"/> Ja, im Rahmen einer Ausbildung |
| <input type="checkbox"/> Ja, im Rahmen von Berufserfahrung        |                                                         |

## 9. Haben Sie sich im Vorfeld an einer anderen Universität beworben?

- |                             |                               |
|-----------------------------|-------------------------------|
| <input type="checkbox"/> Ja | <input type="checkbox"/> Nein |
|-----------------------------|-------------------------------|

## 10. Was waren Ihre ersten drei Ortspräferenzen auf dem Zulassungsantrag der Quote, über die Sie zugelassen wurden?

1.

2.

3.

## 11. Über welche Quote wurden Sie zum Medizinstudium zugelassen?

- |                                                                  |                                                  |
|------------------------------------------------------------------|--------------------------------------------------|
| Abiturbestenquote                                                | <input type="checkbox"/> --> weiter mit Frage 14 |
| AdH-Auswahlverfahren der Hochschule (HAM-Nat und Exzellenzquote) | <input type="checkbox"/> --> weiter mit Frage 12 |
| Wartezeitquote                                                   | <input type="checkbox"/> --> weiter mit Frage 14 |
| Sonstiges                                                        | <input type="checkbox"/> --> weiter mit Frage 14 |

## 12. Wie fühlten Sie sich durch die Schule auf den HAM-Nat-Test vorbereitet?

- |                                     |                                      |                                       |                              |                                   |
|-------------------------------------|--------------------------------------|---------------------------------------|------------------------------|-----------------------------------|
| <input type="checkbox"/> mangelhaft | <input type="checkbox"/> ausreichend | <input type="checkbox"/> befriedigend | <input type="checkbox"/> gut | <input type="checkbox"/> sehr gut |
|-------------------------------------|--------------------------------------|---------------------------------------|------------------------------|-----------------------------------|

**13. Denken Sie, dass die Vorbereitungen auf den Auswahltest Ihnen auch im zukünftigen Medizinstudium von Nutzen sein werden?**

☐ ja

☐ nein

**14. Ist das Medizinstudium Ihr ursprüngliches "Wunschfach"?**

☐ Medizin ist mein Wunschfach

☐ Ich hatte keinen speziellen Studienwunsch

☐ Ich hätte lieber folgendes Fach studiert:

**15. Wie zutreffend sind folgende Gründe für Ihre Wahl eines Medizinstudium?**

|                                             | trifft<br>überhaupt<br>nicht zu | trifft<br>wenig<br>zu    | teils/<br>teils          | trifft<br>ziemlich<br>zu | trifft<br>völlig<br>zu   | keine<br>Angabe          |
|---------------------------------------------|---------------------------------|--------------------------|--------------------------|--------------------------|--------------------------|--------------------------|
| persönliche Neigungen und Begabungen        | <input type="checkbox"/>        | <input type="checkbox"/> | <input type="checkbox"/> | <input type="checkbox"/> | <input type="checkbox"/> | <input type="checkbox"/> |
| naturwissenschaftliches Interesse           | <input type="checkbox"/>        | <input type="checkbox"/> | <input type="checkbox"/> | <input type="checkbox"/> | <input type="checkbox"/> | <input type="checkbox"/> |
| Aussicht auf ein hohes Einkommen            | <input type="checkbox"/>        | <input type="checkbox"/> | <input type="checkbox"/> | <input type="checkbox"/> | <input type="checkbox"/> | <input type="checkbox"/> |
| Vielfalt der beruflichen Möglichkeiten      | <input type="checkbox"/>        | <input type="checkbox"/> | <input type="checkbox"/> | <input type="checkbox"/> | <input type="checkbox"/> | <input type="checkbox"/> |
| Ratschläge von Eltern/Verwandten/Freunden   | <input type="checkbox"/>        | <input type="checkbox"/> | <input type="checkbox"/> | <input type="checkbox"/> | <input type="checkbox"/> | <input type="checkbox"/> |
| Fachinteresse                               | <input type="checkbox"/>        | <input type="checkbox"/> | <input type="checkbox"/> | <input type="checkbox"/> | <input type="checkbox"/> | <input type="checkbox"/> |
| Streben nach einem angesehenen Beruf        | <input type="checkbox"/>        | <input type="checkbox"/> | <input type="checkbox"/> | <input type="checkbox"/> | <input type="checkbox"/> | <input type="checkbox"/> |
| Empfehlung von Studien- oder Berufsberatung | <input type="checkbox"/>        | <input type="checkbox"/> | <input type="checkbox"/> | <input type="checkbox"/> | <input type="checkbox"/> | <input type="checkbox"/> |
| fester Berufswunsch                         | <input type="checkbox"/>        | <input type="checkbox"/> | <input type="checkbox"/> | <input type="checkbox"/> | <input type="checkbox"/> | <input type="checkbox"/> |
| gute Arbeitsmarktchancen                    | <input type="checkbox"/>        | <input type="checkbox"/> | <input type="checkbox"/> | <input type="checkbox"/> | <input type="checkbox"/> | <input type="checkbox"/> |
| zufällige Entscheidung                      | <input type="checkbox"/>        | <input type="checkbox"/> | <input type="checkbox"/> | <input type="checkbox"/> | <input type="checkbox"/> | <input type="checkbox"/> |
| mit Menschen arbeiten                       | <input type="checkbox"/>        | <input type="checkbox"/> | <input type="checkbox"/> | <input type="checkbox"/> | <input type="checkbox"/> | <input type="checkbox"/> |
| anderen Menschen helfen                     | <input type="checkbox"/>        | <input type="checkbox"/> | <input type="checkbox"/> | <input type="checkbox"/> | <input type="checkbox"/> | <input type="checkbox"/> |
| Nützliches für die Allgemeinheit tun        | <input type="checkbox"/>        | <input type="checkbox"/> | <input type="checkbox"/> | <input type="checkbox"/> | <input type="checkbox"/> | <input type="checkbox"/> |
| Unbekanntes erforschen                      | <input type="checkbox"/>        | <input type="checkbox"/> | <input type="checkbox"/> | <input type="checkbox"/> | <input type="checkbox"/> | <input type="checkbox"/> |
| Wissenschaftlich tätig sein                 | <input type="checkbox"/>        | <input type="checkbox"/> | <input type="checkbox"/> | <input type="checkbox"/> | <input type="checkbox"/> | <input type="checkbox"/> |
| neue Aufgaben gestellt bekommen             | <input type="checkbox"/>        | <input type="checkbox"/> | <input type="checkbox"/> | <input type="checkbox"/> | <input type="checkbox"/> | <input type="checkbox"/> |
| eigene Ideen verwirklichen                  | <input type="checkbox"/>        | <input type="checkbox"/> | <input type="checkbox"/> | <input type="checkbox"/> | <input type="checkbox"/> | <input type="checkbox"/> |

**16. Sie haben sich für ein Studium an der Otto-von-Guericke Universität entschieden. Wie wichtig waren Ihnen folgende Gründe für diese Wahl?**

|                                                    | überhaupt<br>nicht<br>wichtig | kaum<br>wichtig          | teils/<br>teils          | ziemlich<br>wichtig      | sehr<br>wichtig          | keine<br>Angabe          |
|----------------------------------------------------|-------------------------------|--------------------------|--------------------------|--------------------------|--------------------------|--------------------------|
| Tradition und Ruf der Hochschule                   | <input type="checkbox"/>      | <input type="checkbox"/> | <input type="checkbox"/> | <input type="checkbox"/> | <input type="checkbox"/> | <input type="checkbox"/> |
| vorhandenes soziales Umfeld (Partner, Freunde,...) | <input type="checkbox"/>      | <input type="checkbox"/> | <input type="checkbox"/> | <input type="checkbox"/> | <input type="checkbox"/> | <input type="checkbox"/> |
| Attraktivität von Stadt und Umgebung               | <input type="checkbox"/>      | <input type="checkbox"/> | <input type="checkbox"/> | <input type="checkbox"/> | <input type="checkbox"/> | <input type="checkbox"/> |
| gute Zulassungschancen                             | <input type="checkbox"/>      | <input type="checkbox"/> | <input type="checkbox"/> | <input type="checkbox"/> | <input type="checkbox"/> | <input type="checkbox"/> |
| regionale Nähe zum Heimatort                       | <input type="checkbox"/>      | <input type="checkbox"/> | <input type="checkbox"/> | <input type="checkbox"/> | <input type="checkbox"/> | <input type="checkbox"/> |
| günstige Lebenshaltungskosten                      | <input type="checkbox"/>      | <input type="checkbox"/> | <input type="checkbox"/> | <input type="checkbox"/> | <input type="checkbox"/> | <input type="checkbox"/> |

**16. Sie haben sich für ein Studium an der Otto-von-Guericke Universität entschieden. Wie wichtig waren Ihnen folgende Gründe für diese Wahl? (Fortsetzung)**

|                                                   | überhaupt<br>nicht<br>wichtig | kaum<br>wichtig          | teils/<br>teils          | ziemlich<br>wichtig      | sehr<br>wichtig          | keine<br>Angabe          |
|---------------------------------------------------|-------------------------------|--------------------------|--------------------------|--------------------------|--------------------------|--------------------------|
| gewünschte Fachrichtung                           | <input type="checkbox"/>      | <input type="checkbox"/> | <input type="checkbox"/> | <input type="checkbox"/> | <input type="checkbox"/> | <input type="checkbox"/> |
| Forschungsausrichtung/-schwerpunkte               | <input type="checkbox"/>      | <input type="checkbox"/> | <input type="checkbox"/> | <input type="checkbox"/> | <input type="checkbox"/> | <input type="checkbox"/> |
| finanzielle Überlegungen                          | <input type="checkbox"/>      | <input type="checkbox"/> | <input type="checkbox"/> | <input type="checkbox"/> | <input type="checkbox"/> | <input type="checkbox"/> |
| guter Platz in Rankinglisten                      | <input type="checkbox"/>      | <input type="checkbox"/> | <input type="checkbox"/> | <input type="checkbox"/> | <input type="checkbox"/> | <input type="checkbox"/> |
| bundesweite Statistik der Staatsexamensergebnisse | <input type="checkbox"/>      | <input type="checkbox"/> | <input type="checkbox"/> | <input type="checkbox"/> | <input type="checkbox"/> | <input type="checkbox"/> |
| internationale Ausrichtung des Studienganges      | <input type="checkbox"/>      | <input type="checkbox"/> | <input type="checkbox"/> | <input type="checkbox"/> | <input type="checkbox"/> | <input type="checkbox"/> |
| gute Lernbedingungen                              | <input type="checkbox"/>      | <input type="checkbox"/> | <input type="checkbox"/> | <input type="checkbox"/> | <input type="checkbox"/> | <input type="checkbox"/> |
| keine Studiengebühren                             | <input type="checkbox"/>      | <input type="checkbox"/> | <input type="checkbox"/> | <input type="checkbox"/> | <input type="checkbox"/> | <input type="checkbox"/> |
| Zuweisung durch Hochschulstart                    | <input type="checkbox"/>      | <input type="checkbox"/> | <input type="checkbox"/> | <input type="checkbox"/> | <input type="checkbox"/> | <input type="checkbox"/> |
| Magdeburg ist keine "Massenuniversität"           | <input type="checkbox"/>      | <input type="checkbox"/> | <input type="checkbox"/> | <input type="checkbox"/> | <input type="checkbox"/> | <input type="checkbox"/> |

**17. Welche Informationsquellen haben Sie vor der Entscheidung für Magdeburg herangezogen?**

|                                   | herangezogen                   |                                    |                                   |
|-----------------------------------|--------------------------------|------------------------------------|-----------------------------------|
| Auskünfte im Freundeskreis        | <input type="checkbox"/> nicht | <input type="checkbox"/> teilweise | <input type="checkbox"/> intensiv |
| Hinweise innerhalb der Familie    | <input type="checkbox"/> nicht | <input type="checkbox"/> teilweise | <input type="checkbox"/> intensiv |
| Homepage der Universität          | <input type="checkbox"/> nicht | <input type="checkbox"/> teilweise | <input type="checkbox"/> intensiv |
| individuelle Studienberatung      | <input type="checkbox"/> nicht | <input type="checkbox"/> teilweise | <input type="checkbox"/> intensiv |
| Internetrecherche (z.B. in Foren) | <input type="checkbox"/> nicht | <input type="checkbox"/> teilweise | <input type="checkbox"/> intensiv |
| Agentur für Arbeit                | <input type="checkbox"/> nicht | <input type="checkbox"/> teilweise | <input type="checkbox"/> intensiv |
| Tag der offenen Tür/ Campus Days  | <input type="checkbox"/> nicht | <input type="checkbox"/> teilweise | <input type="checkbox"/> intensiv |
| Schnupperstudium                  | <input type="checkbox"/> nicht | <input type="checkbox"/> teilweise | <input type="checkbox"/> intensiv |
| Lange Nacht der Wissenschaft      | <input type="checkbox"/> nicht | <input type="checkbox"/> teilweise | <input type="checkbox"/> intensiv |

Sonstiges:

**18. Welche Erwartungen haben Sie an Ihr Studium/ an das Studienfach?**

|                                                 | trifft<br>überhaupt<br>nicht zu | trifft<br>wenig<br>zu    | teils/<br>teils          | trifft<br>ziemlich<br>zu | trifft<br>völlig<br>zu   | keine<br>Angabe          |
|-------------------------------------------------|---------------------------------|--------------------------|--------------------------|--------------------------|--------------------------|--------------------------|
| großes Faktenwissen erwerben                    | <input type="checkbox"/>        | <input type="checkbox"/> | <input type="checkbox"/> | <input type="checkbox"/> | <input type="checkbox"/> | <input type="checkbox"/> |
| Prüfungen bestehen                              | <input type="checkbox"/>        | <input type="checkbox"/> | <input type="checkbox"/> | <input type="checkbox"/> | <input type="checkbox"/> | <input type="checkbox"/> |
| viel und intensiv arbeiten                      | <input type="checkbox"/>        | <input type="checkbox"/> | <input type="checkbox"/> | <input type="checkbox"/> | <input type="checkbox"/> | <input type="checkbox"/> |
| sich mit theoretischen Fragen auseinandersetzen | <input type="checkbox"/>        | <input type="checkbox"/> | <input type="checkbox"/> | <input type="checkbox"/> | <input type="checkbox"/> | <input type="checkbox"/> |
| Praxisbezug                                     | <input type="checkbox"/>        | <input type="checkbox"/> | <input type="checkbox"/> | <input type="checkbox"/> | <input type="checkbox"/> | <input type="checkbox"/> |
| wissenschaftlich arbeiten                       | <input type="checkbox"/>        | <input type="checkbox"/> | <input type="checkbox"/> | <input type="checkbox"/> | <input type="checkbox"/> | <input type="checkbox"/> |
| Forschungsbezug                                 | <input type="checkbox"/>        | <input type="checkbox"/> | <input type="checkbox"/> | <input type="checkbox"/> | <input type="checkbox"/> | <input type="checkbox"/> |

## 19. Wie wichtig ist Ihnen?

|                                                  | überhaupt<br>nicht<br>wichtig | kaum<br>wichtig          | teils/<br>teils          | ziemlich<br>wichtig      | sehr<br>wichtig          | keine<br>Angabe          |
|--------------------------------------------------|-------------------------------|--------------------------|--------------------------|--------------------------|--------------------------|--------------------------|
| die Vereinbarkeit von Studium und Familie        | <input type="checkbox"/>      | <input type="checkbox"/> | <input type="checkbox"/> | <input type="checkbox"/> | <input type="checkbox"/> | <input type="checkbox"/> |
| die Vereinbarkeit von Studium und Nebenjob/Beruf | <input type="checkbox"/>      | <input type="checkbox"/> | <input type="checkbox"/> | <input type="checkbox"/> | <input type="checkbox"/> | <input type="checkbox"/> |
| Möglichkeit eines Teilzeitstudiums               | <input type="checkbox"/>      | <input type="checkbox"/> | <input type="checkbox"/> | <input type="checkbox"/> | <input type="checkbox"/> | <input type="checkbox"/> |

## 20. Wie beabsichtigen Sie Ihr Studium zu finanzieren?

|                                                    |                                |                                    |                                        |
|----------------------------------------------------|--------------------------------|------------------------------------|----------------------------------------|
| Ersparnisse/Eigenkapital                           | <input type="checkbox"/> nicht | <input type="checkbox"/> teilweise | <input type="checkbox"/> hauptsächlich |
| Unterstützung durch die Eltern/Verwandte           | <input type="checkbox"/> nicht | <input type="checkbox"/> teilweise | <input type="checkbox"/> hauptsächlich |
| Unterstützung durch den/die Partner/in             | <input type="checkbox"/> nicht | <input type="checkbox"/> teilweise | <input type="checkbox"/> hauptsächlich |
| BAföG                                              | <input type="checkbox"/> nicht | <input type="checkbox"/> teilweise | <input type="checkbox"/> hauptsächlich |
| eigener Verdienst/ Job                             | <input type="checkbox"/> nicht | <input type="checkbox"/> teilweise | <input type="checkbox"/> hauptsächlich |
| Stipendium                                         | <input type="checkbox"/> nicht | <input type="checkbox"/> teilweise | <input type="checkbox"/> hauptsächlich |
| Studentenkredit                                    | <input type="checkbox"/> nicht | <input type="checkbox"/> teilweise | <input type="checkbox"/> hauptsächlich |
| Kindergeld                                         | <input type="checkbox"/> nicht | <input type="checkbox"/> teilweise | <input type="checkbox"/> hauptsächlich |
| soziale Unterstützung (z.B. Sozialhilfe, Wohngeld) | <input type="checkbox"/> nicht | <input type="checkbox"/> teilweise | <input type="checkbox"/> hauptsächlich |

## 21. Beabsichtigen Sie, während des Studiums zu arbeiten?

☐ Nein

☐ Ja, in der vorlesungsfreien Zeit --> ☐ ≤20 ☐ ≤40 ☐ ≤60 ☐ ≤80 ☐ >80 Stunden im Monat

☐ Ja, in der Vorlesungszeit --> ☐ ≤20 ☐ ≤40 ☐ ≤60 ☐ ≤80 ☐ >80 Stunden im Monat

☐ Ja, während des gesamten Semesters --> ☐ ≤20 ☐ ≤40 ☐ ≤60 ☐ ≤80 ☐ >80 Stunden im Monat

☐ Weiß ich noch nicht

## 22. Wie informiert fühlen Sie sich über folgende Bereiche?

|                                                           | gar nicht                | wenig                    | ausreichend              | gut                      | sehr gut                 | interessiert<br>mich nicht |
|-----------------------------------------------------------|--------------------------|--------------------------|--------------------------|--------------------------|--------------------------|----------------------------|
| Studien- und Prüfungsordnung                              | <input type="checkbox"/>   |
| Möglichkeiten der Studienberatung                         | <input type="checkbox"/>   |
| Einzelheiten des BAföG                                    | <input type="checkbox"/>   |
| Möglichkeiten für ein Studium im Ausland                  | <input type="checkbox"/>   |
| Arbeitsmarktsituation im angestrebten Tätigkeitsfeld      | <input type="checkbox"/>   |
| aktuelle politische Überlegungen der Hochschulentwicklung | <input type="checkbox"/>   |

### 23. Wie schätzen Sie die zukünftig an Sie gestellten Studienanforderungen ein?

|                                                                          |                                    |                                        |                                  |                                                    |
|--------------------------------------------------------------------------|------------------------------------|----------------------------------------|----------------------------------|----------------------------------------------------|
| fachliches Niveau                                                        | <input type="checkbox"/> zu gering | <input type="checkbox"/> genau richtig | <input type="checkbox"/> zu hoch | <input type="checkbox"/> kann ich nicht beurteilen |
| Umfang des Stoffes                                                       | <input type="checkbox"/> zu gering | <input type="checkbox"/> genau richtig | <input type="checkbox"/> zu hoch | <input type="checkbox"/> kann ich nicht beurteilen |
| Zeitintensität (Gesamtaufwand Studium, Lehrveranstaltungen und Lernzeit) | <input type="checkbox"/> zu gering | <input type="checkbox"/> genau richtig | <input type="checkbox"/> zu hoch | <input type="checkbox"/> kann ich nicht beurteilen |

### 24. Wie wichtig sind Ihnen folgende Aspekte im Studium?

|                                                                       | überhaupt<br>nicht<br>wichtig | kaum<br>wichtig          | teils/<br>teils          | ziemlich<br>wichtig      | sehr<br>wichtig          | keine<br>Angabe          |
|-----------------------------------------------------------------------|-------------------------------|--------------------------|--------------------------|--------------------------|--------------------------|--------------------------|
| Abschluss des Studiums in der Regelstudienzeit                        | <input type="checkbox"/>      | <input type="checkbox"/> | <input type="checkbox"/> | <input type="checkbox"/> | <input type="checkbox"/> | <input type="checkbox"/> |
| Bestehen des Studiums                                                 | <input type="checkbox"/>      | <input type="checkbox"/> | <input type="checkbox"/> | <input type="checkbox"/> | <input type="checkbox"/> | <input type="checkbox"/> |
| den eigenen Maßstäben gerecht werden                                  | <input type="checkbox"/>      | <input type="checkbox"/> | <input type="checkbox"/> | <input type="checkbox"/> | <input type="checkbox"/> | <input type="checkbox"/> |
| einen Bereich finden der Spaß macht                                   | <input type="checkbox"/>      | <input type="checkbox"/> | <input type="checkbox"/> | <input type="checkbox"/> | <input type="checkbox"/> | <input type="checkbox"/> |
| Promotionsthema bearbeiten mit dem Ziel, einen Dokortitel zu erlangen | <input type="checkbox"/>      | <input type="checkbox"/> | <input type="checkbox"/> | <input type="checkbox"/> | <input type="checkbox"/> | <input type="checkbox"/> |
| ein breites Allgemeinwissen aneignen                                  | <input type="checkbox"/>      | <input type="checkbox"/> | <input type="checkbox"/> | <input type="checkbox"/> | <input type="checkbox"/> | <input type="checkbox"/> |
| nachhaltiges Wissen erlangen                                          | <input type="checkbox"/>      | <input type="checkbox"/> | <input type="checkbox"/> | <input type="checkbox"/> | <input type="checkbox"/> | <input type="checkbox"/> |
| ein "Leben" neben dem Studium                                         | <input type="checkbox"/>      | <input type="checkbox"/> | <input type="checkbox"/> | <input type="checkbox"/> | <input type="checkbox"/> | <input type="checkbox"/> |

### 25. Aus Ihrer heutigen Sicht, in welcher Fachdisziplin möchten Sie tätig sein (Einfachnennung)?

- ☐ Chirurgie      ☐ Innere Medizin      ☐ Allgemeinmedizin      ☐ Kinderheilkunde
- ☐ Frauenheilkunde      ☐ andere Fachrichtung, und zwar:
- ☐ noch nicht darüber nachgedacht

### 26. Wenn Sie sich jetzt für Ihre Zukunft entscheiden müssten, welche Richtung würden Sie wählen (Einfachnennung)?

- eigene Niederlassung ☐ --> weiter mit Frage 25
- Angestellte/r in einer Klinik ☐ --> weiter mit Frage 27
- Angestellter in einer Praxis/Medizinisches Versorgungszentrum ☐ --> weiter mit Frage 27
- Arbeit in der Wissenschaft/Forschung ☐ --> weiter mit Frage 27
- Angestellte/r im öffentlichen Gesundheitsdienst ☐ --> weiter mit Frage 27
- Gesundheitsdienst (MDK, Krankenkasse, Gesundheitsamt,...)

### 27. Wenn Sie sich für eine Niederlassung entscheiden würden. Welcher Bereich würde Ihnen mehr zusagen?

- ☐ Niederlassung als Hausarzt      ☐ Niederlassung als Spezialist

### 28. Wo würden Sie sich am ehesten niederlassen?

- ☐ In einer Großstadt (>100.000 Einwohner)      ☐ in einer mittelgroßen Stadt (20.000-100.000 Einwohner)
- ☐ in einer Kleinstadt (<20.000 Einwohner)      ☐ in einer ländlichen Region

29. Jetzt würden wir gerne von Ihnen wissen, wo Sie sich selbst in 10 Jahren sehen.

30. Nennen Sie uns bitte Ihr Geschlecht.

☐ weiblich

☐ männlich

31. In welchem Jahr wurden Sie geboren?

☐ 1996

☐ 1995

☐ 1994

☐ 1993

☐ 1992

☐ 1991

☐ 1990

☐ 1989

☐ 1988

☐ 1987

☐ anderes Geburtsjahr:

32. Welche Staatsangehörigkeit besitzen Sie?

☐ Deutsche Staatsangehörigkeit

☐ sonstige EU-Staatsangehörigkeit

☐ Doppelte Staatsangehörigkeit

☐ Nicht-EU-Staatsangehörigkeit

33. Bitte geben Sie Ihren Familienstand an.

☐ ledig

☐ verheiratet/ in Partnerschaft lebend

☐ geschieden/ verwitwet

34. Wie viele Kinder haben Sie?

☐ keine

☐ 1 Kind

☐ 2 Kinder

☐ mehr als 2 Kinder

**35. Nennen Sie uns bitte den höchsten berufsqualifizierenden Abschluss Ihrer Eltern.**

Vater:

- ☐ keinen beruflichen Abschluss
- ☐ Lehre bzw. Facharbeiterabschluss
- ☐ Meisterprüfung
- ☐ Fachschule, Technikerschule, Handelsakademie o.Ä.
- ☐ Fachhochschule, Spezialhochschule
- ☐ Universität, Technische Hochschule o.Ä.
- ☐ sonstiges, weiß nicht

Mutter:

- ☐ keinen beruflichen Abschluss
- ☐ Lehre bzw. Facharbeiterabschluss
- ☐ Meisterprüfung
- ☐ Fachschule, Technikerschule, Handelsakademie o.Ä.
- ☐ Fachhochschule, Spezialhochschule
- ☐ Universität, Technische Hochschule o.Ä.
- ☐ sonstiges, weiß nicht

**36. Sind Ihre Eltern im Gesundheitswesen tätig?**

Vater:

- ☐ nein
- ☐ Ärztliche Tätigkeit
- ☐ Krankenpflege
- ☐ Rettungsdienst

Mutter:

- ☐ nein
- ☐ Ärztliche Tätigkeit
- ☐ Krankenpflege
- ☐ Rettungsdienst

Teilnehmer, die an der Soziodemographischen Studie im Rahmen des hochschuleigenen Auswahlverfahrens (HAM-Nat)<sup>2</sup> teilgenommen haben, bitten wir an dieser Stelle Ihre Matrikel-Nummer einzutragen:

|  |  |  |  |  |  |  |  |  |
|--|--|--|--|--|--|--|--|--|
|  |  |  |  |  |  |  |  |  |
|--|--|--|--|--|--|--|--|--|

**Vielen Dank für Ihre Teilnahme!**

<sup>2</sup> Alle im Rahmen der Studie erhobenen Daten werden pseudonymisiert verarbeitet. Dies bedeutet, dass Ihr Name durch einen Code ersetzt wird. Zugang zu der Schlüsselliste mit Code und Namen hat jeweils nur ein(e) Mitarbeiter(in) des Studiendekanates sowie sein bzw. ihre Vertreter(in), zu den pseudonymisierten Daten nur der Studienleiter sowie Mitarbeiter(innen) des Studiendekanates. Die Schlüsselliste wird 6 Jahre nach Beendigung Ihres Studiums gelöscht, so dass ein Personenbezug dann nicht mehr möglich ist.
