# Supplementary material for: Introduction of the HAM-Nat examination – applicants and students admitted to the Medical Faculty in 2012-2014
Source: PubMed Central journal article supplement (PMC4647160; doi:10.3205/zma000995), 2015-11-16
Supplement: ZMA-32-53-s-002.pdf [file ZMA-32-53-s-002.pdf]

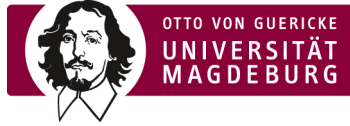

DER KANZLER

DEZERNAT  
STUDIENANGELEGENHEITEN  
K32

**Daniel Grupski**

Otto-von-Guericke-Universität Magdeburg  
Universitätsplatz 2  
39106 Magdeburg

Telefon: +49 391 67-11206  
Telefax: +49 391 67-11140

daniel.grupski@ovgu.de  
www.ovgu.de

Otto-von-Guericke-Universität Magdeburg, Postfach 4120, 39016 Magdeburg

An:  
Erstsemesterbefragung  
persönlich/vertraulich

Evaluationsergebnisse 2013

---

Sehr geehrter Herr/Sehr geehrte Frau Erstsemesterbefragung,

Sie erhalten hier die Evaluationsergebnisse Ihrer Lehrveranstaltung: 2013.  
Bei Rückfragen stehe ich Ihnen gerne zur Verfügung.

Fragebogen Typ FME80.

---

Mit freundlichen Grüßen  
Daniel Grupski

**Anlage**  
Auswertungsbericht

# Erstsemesterbefragung

2013 ()  
Erfasste Fragebögen = 147

**MED**

## Auswertungsteil der geschlossenen Fragen

### Legende

Frage

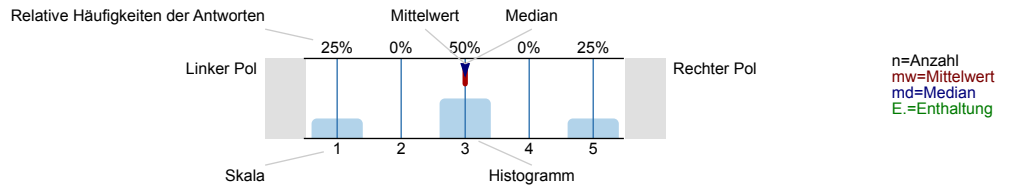

### 1. In welchem Jahr haben Sie die Hochschulreife erworben?

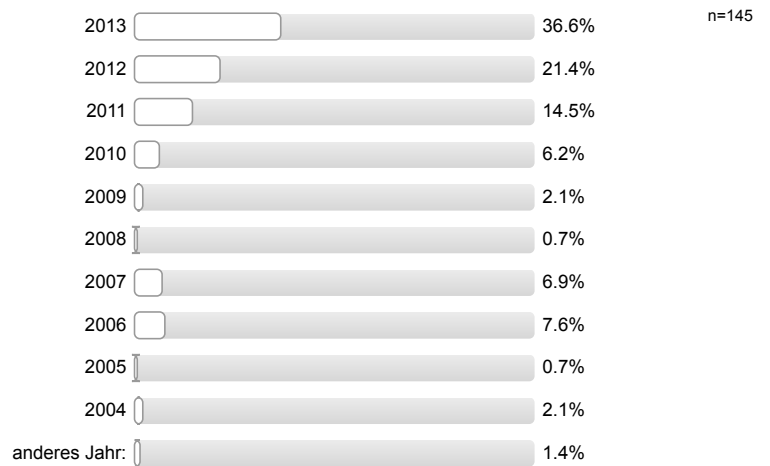

### 2. In welchem Bundesland haben Sie die Hochschulreife erworben? Oder war das im Ausland?

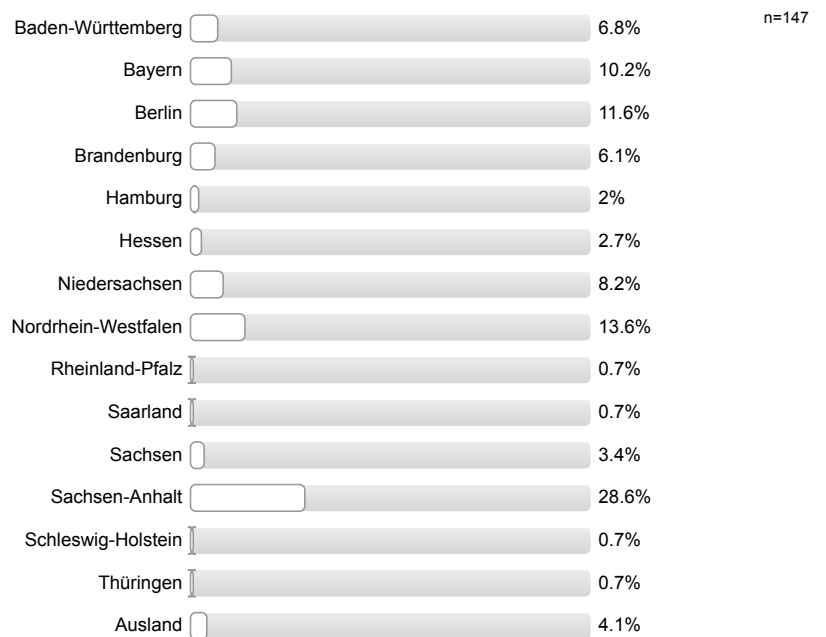

3. Mit welcher Durchschnittsnote haben Sie die Hochschulreife erworben?

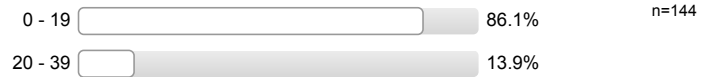

4. Welches Profil verfolgte die Ausbildungsstätte, in der Sie die Hochschulzugangsberechtigung erworben haben?

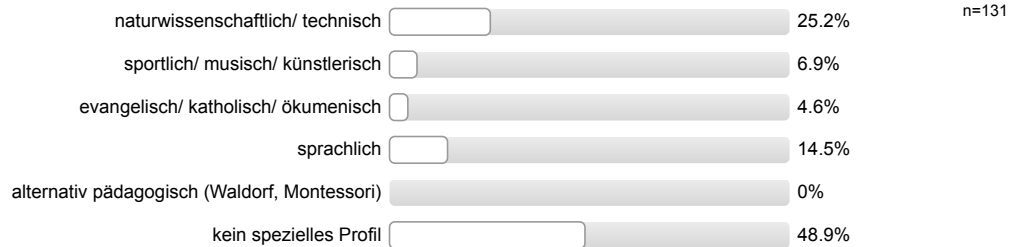

6. Nach welchem Kriterium haben Sie Ihre Leistungskurse ausgewählt?

Erreichung der bestmöglichen Abiturnote

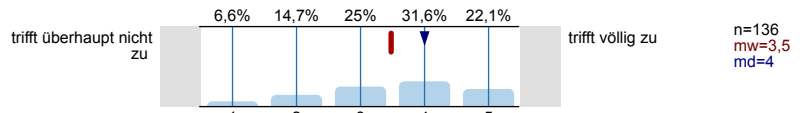

Interesse am Inhalt des Faches

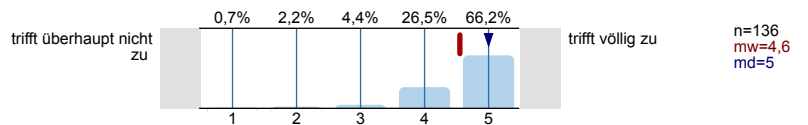

gute Vorbereitung auf das zukünftige Studium

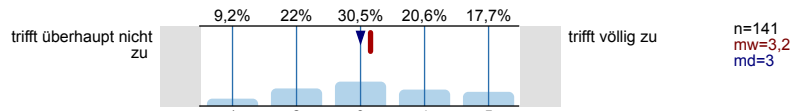

Empfehlung durch Angehörige/Bekannte

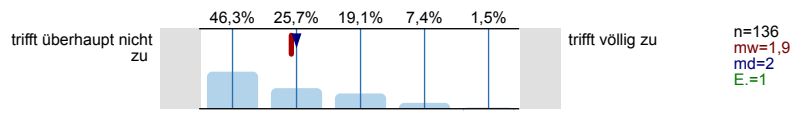

fachliche Unterstützung durch Angehörige/Bekannte

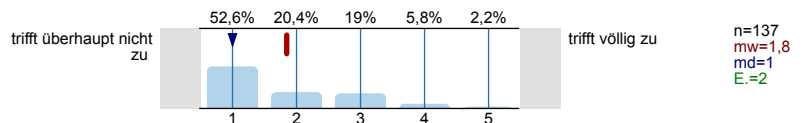

vorgegebenes Angebot der Ausbildungsstätte

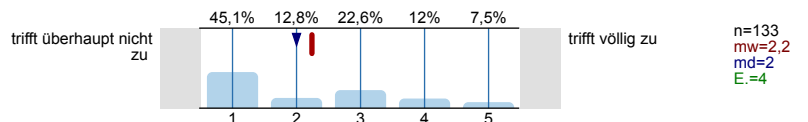

7. Bitte nennen Sie uns Ihre zuletzt ausgeübte Tätigkeit direkt vor der Aufnahme des Studiums.

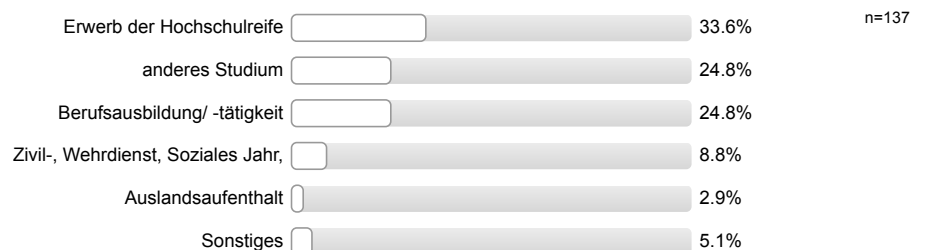

8. Besitzen Sie Vorerfahrungen im medizinischen Bereich (Mehrfachnennungen möglich)?

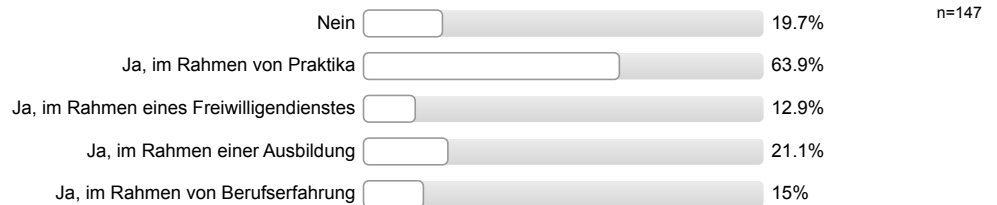

9. Haben Sie sich im Vorfeld an einer anderen Universität beworben?

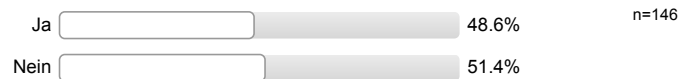

11. Über welche Quote wurden Sie zum Medizinstudium zugelassen?

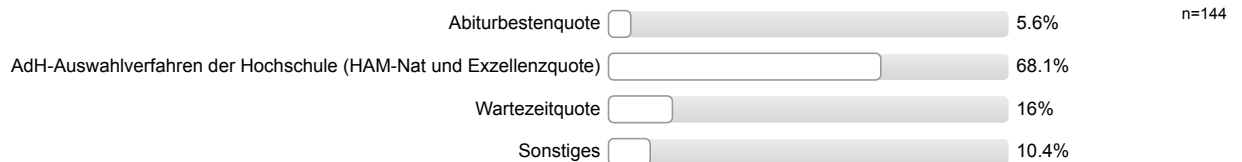

12. Wie fühlten Sie sich durch die Schule auf den HAM-Nat-Test vorbereitet?

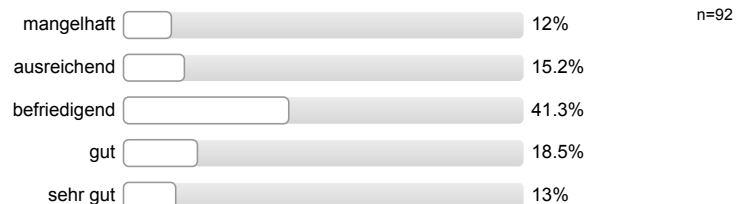

13. Denken Sie, dass die Vorbereitungen auf den Auswahltest Ihnen auch im zukünftigen Medizinstudium von Nutzen sein werden?

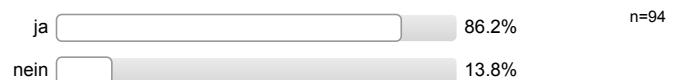

14. Ist das Medizinstudium Ihr ursprüngliches Wunschfach?

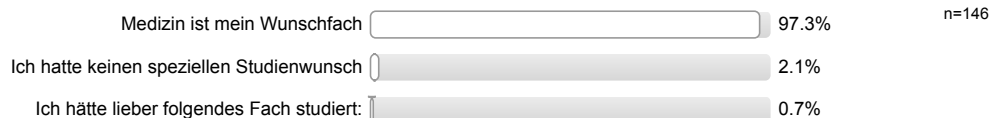

15. Wie zutreffend sind folgende Gründe für Ihre Wahl eines Medizinstudium?

persönliche Neigungen und Begabungen

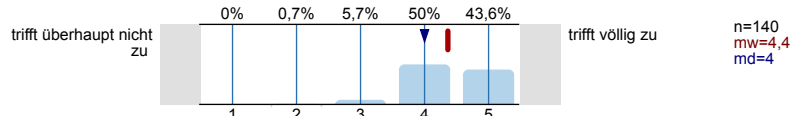

naturwissenschaftliches Interesse

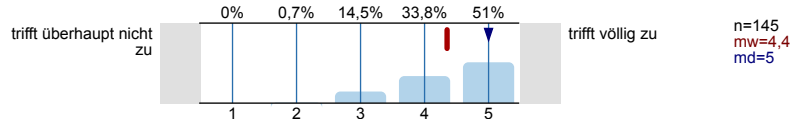

Aussicht auf ein hohes Einkommen

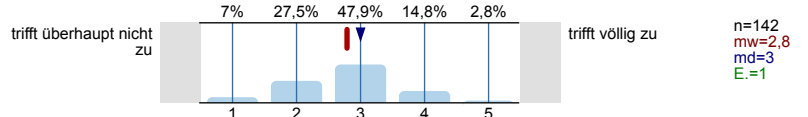

Vielfalt der beruflichen Möglichkeiten

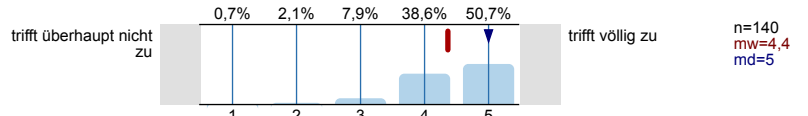

Ratschläge von Eltern/Verwandten/Freunden

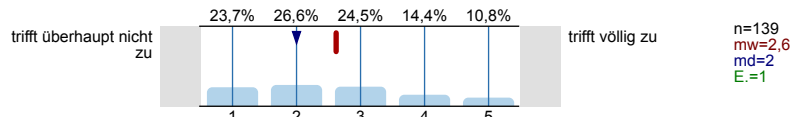

Fachinteresse

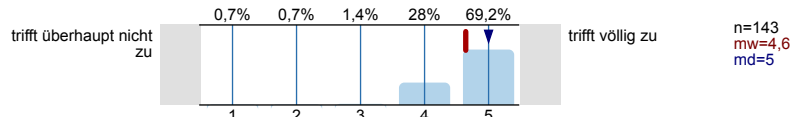

Streben nach einem angesehenen Beruf

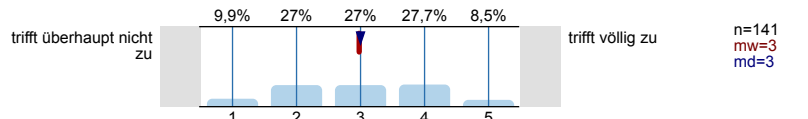

Empfehlung von Studien- oder Berufsberatung

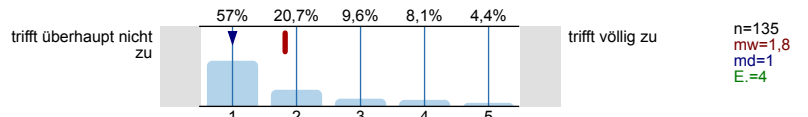

fester Berufswunsch

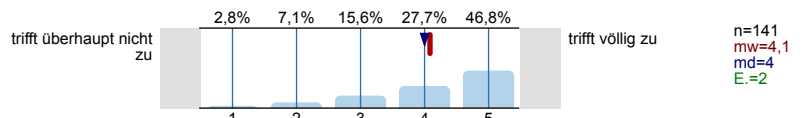

gute Arbeitsmarktchancen

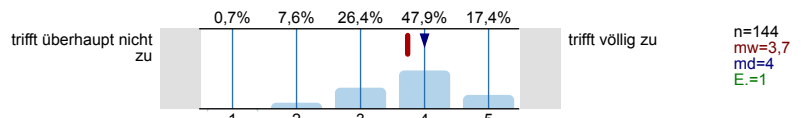

zufällige Entscheidung

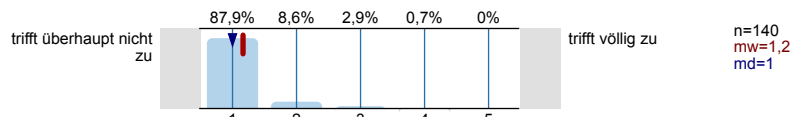

mit Menschen arbeiten

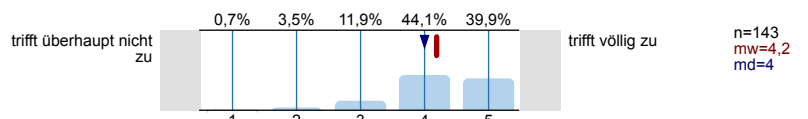

anderen Menschen helfen

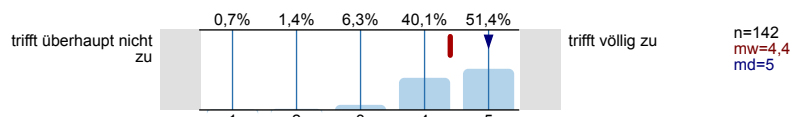

Nützliches für die Allgemeinheit tun

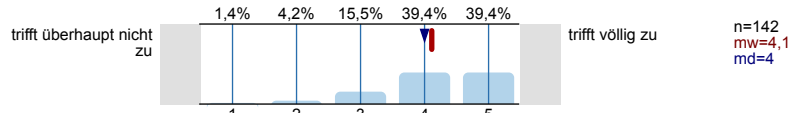

Unbekanntes erforschen

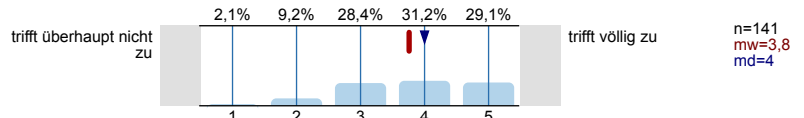

Wissenschaftlich tätig sein

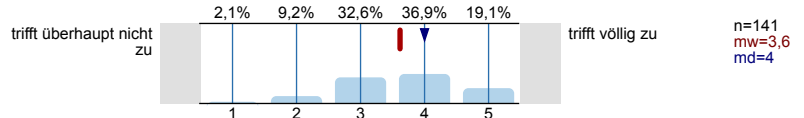

neue Aufgaben gestellt bekommen

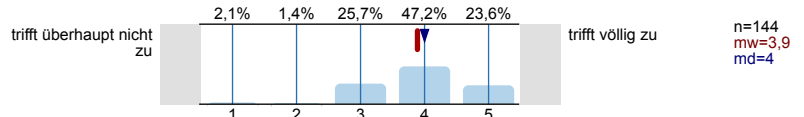

eigene Ideen verwirklichen

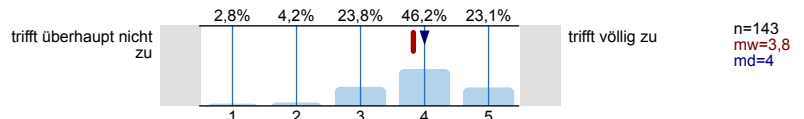

16. Sie haben sich für ein Studium an der Otto-von-Guericke Universität entschieden. Wie wichtig waren Ihnen folgende Gründe für diese Wahl?

Tradition und Ruf der Hochschule

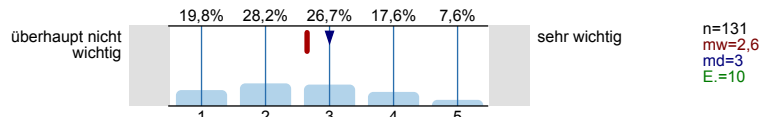

vorhandenes soziales Umfeld (Partner, Freunde,...)

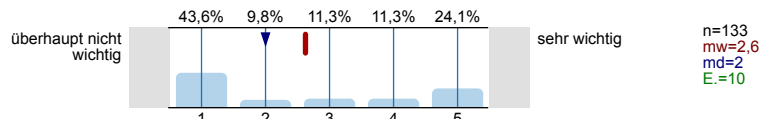

Attraktivität von Stadt und Umgebung

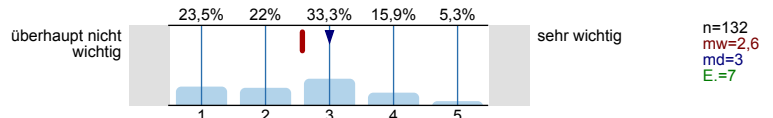

gute Zulassungschancen

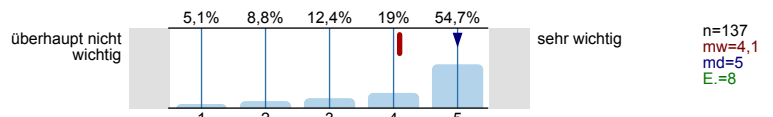

regionale Nähe zum Heimatort

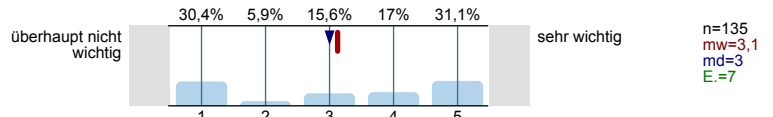

günstige Lebenshaltungskosten

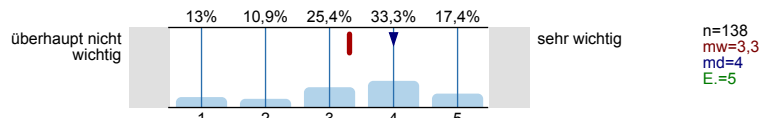

gewünschte Fachrichtung

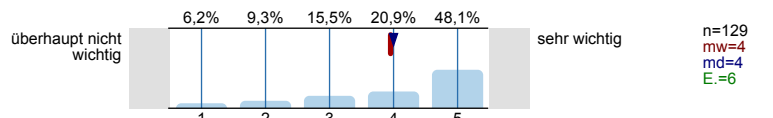

Forschungsausrichtung/-schwerpunkte

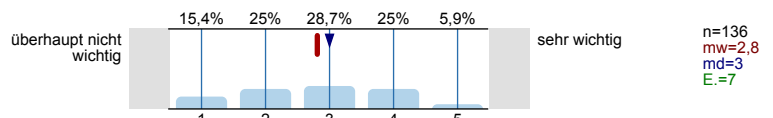

finanzielle Überlegungen

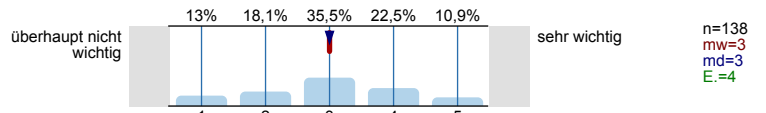

guter Platz in Rankinglisten

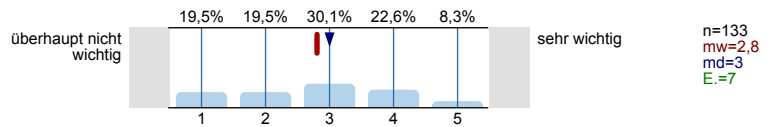

bundesweite Statistik der Staatsexamensergebnisse

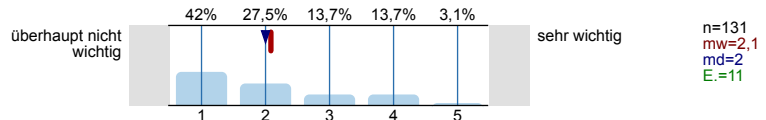

internationale Ausrichtung des Studienganges

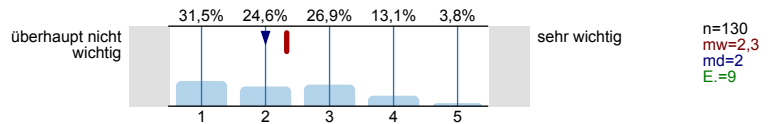

gute Lernbedingungen

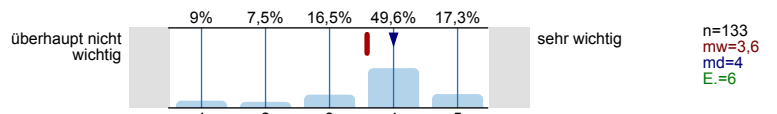

keine Studiengebühren

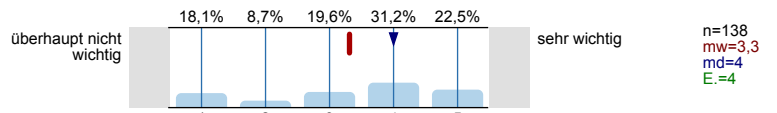

Zuweisung durch Hochschulstart

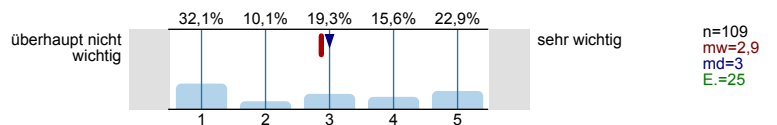

Magdeburg ist keine Massenuniversität

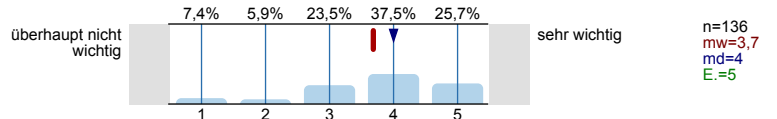

17. Welche Informationsquellen haben Sie vor der Entscheidung für Magdeburg herangezogen?

Auskünfte im Freundeskreis

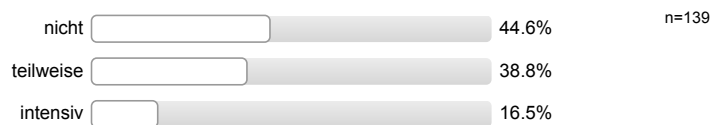

Hinweise innerhalb der Familie

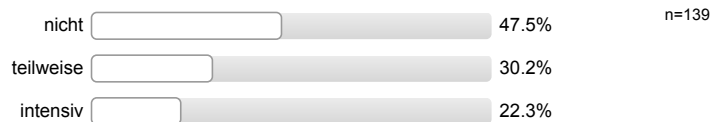

Homepage der Universität

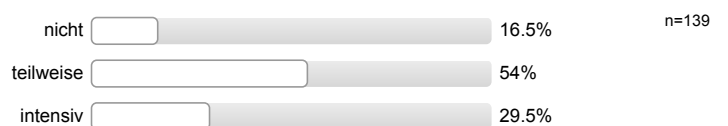

individuelle Studienberatung

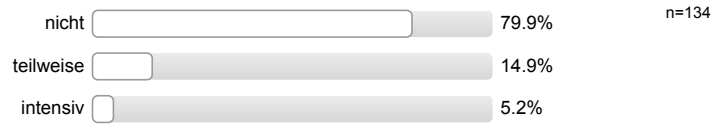

Internetrecherche (z.B. in Foren)

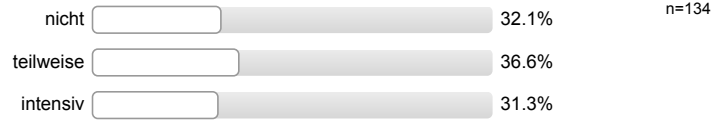

Agentur für Arbeit

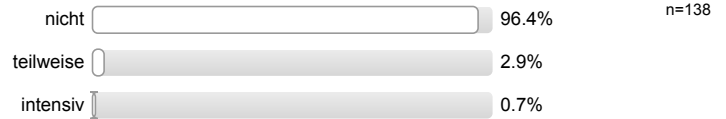

Tag der offenen Tür/ Campus Days

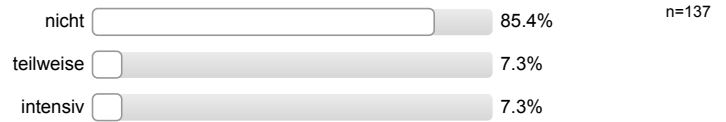

Schnupperstudium

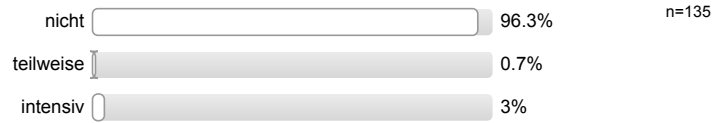

Lange Nacht der Wissenschaft

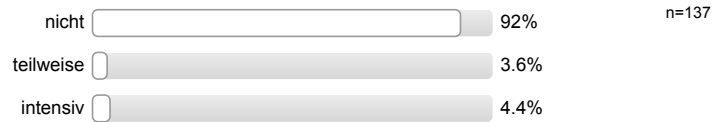

18. Welche Erwartungen haben Sie an Ihr Studium/ an das Studienfach?

großes Faktenwissen erwerben

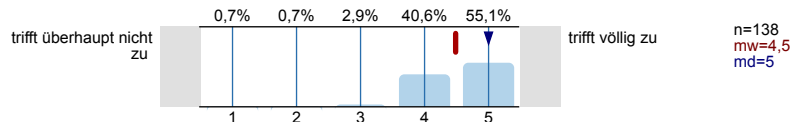

Prüfungen bestehen

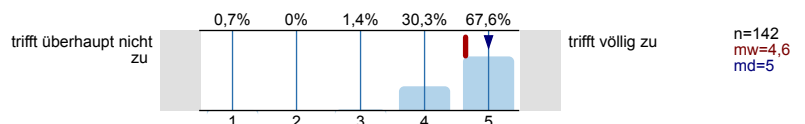

viel und intensiv arbeiten

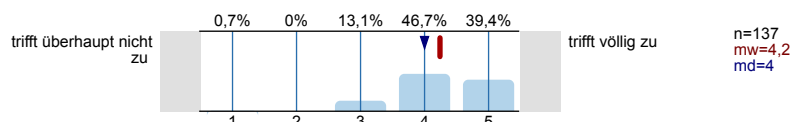

sich mit theoretischen Fragen auseinandersetzen

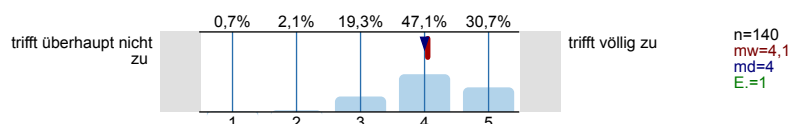



Praxisbezug

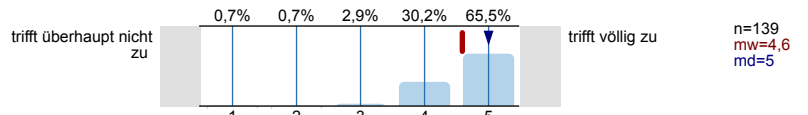

wissenschaftlich arbeiten

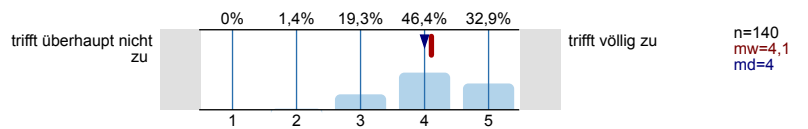

Forschungsbezug

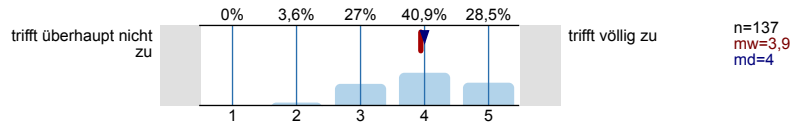

19. Wie wichtig ist Ihnen?

die Vereinbarkeit von Studium und Familie

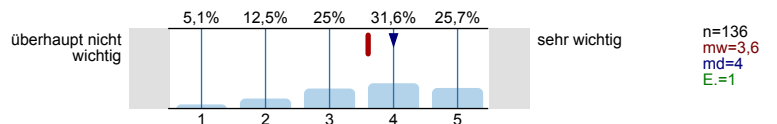

die Vereinbarkeit von Studium und Nebenjob/Beruf

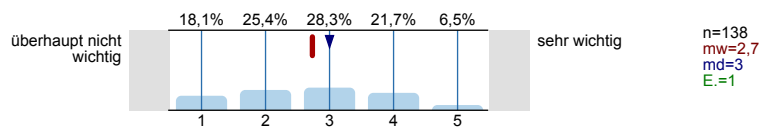

Möglichkeit eines Teilzeitstudiums

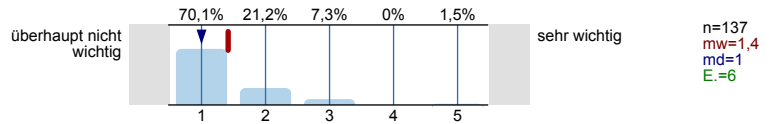

20. Wie beabsichtigen Sie Ihr Studium zu finanzieren?

Ersparnisse/Eigenkapital

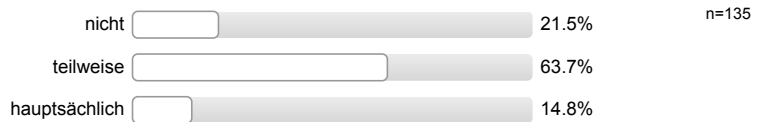

Unterstützung durch die Eltern/Verwandte

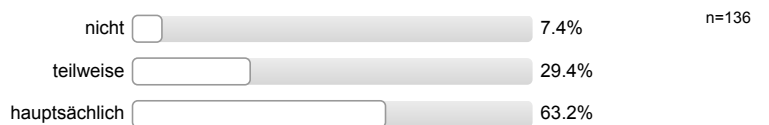

Unterstützung durch den/die Partner/in

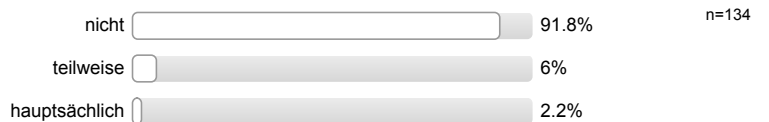

BAföG

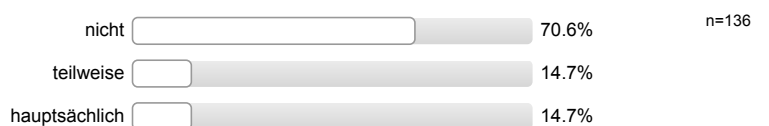

eigener Verdienst/ Job

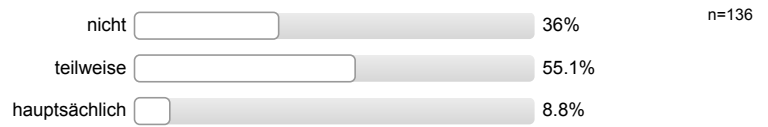

Stipendium

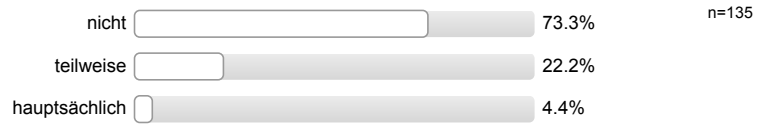

Studentenkredit

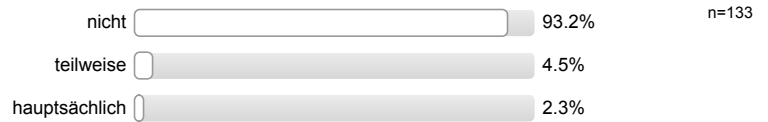

Kindergeld

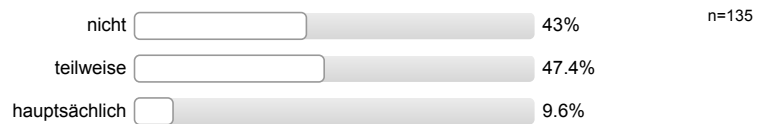

soziale Unterstützung (z.B. Sozialhilfe, Wohngeld)

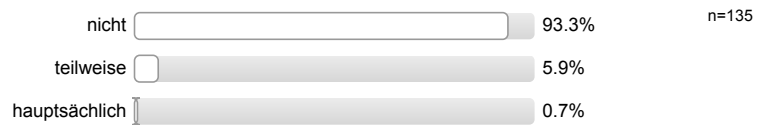

21. Beabsichtigen Sie, während des Studiums zu arbeiten?

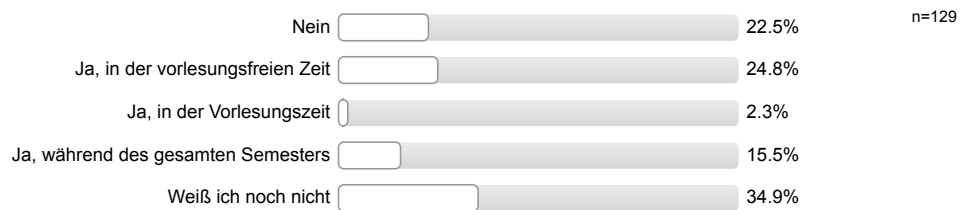

Ja, in der vorlesungsfreien Zeit

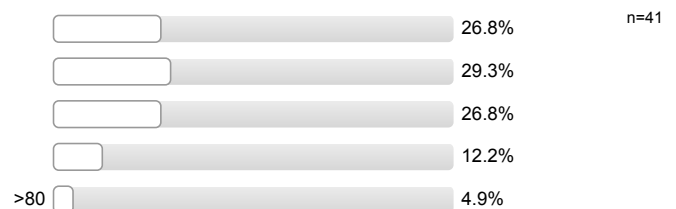

Ja, in der Vorlesungszeit

Es wird keine Auswertung angezeigt, da die Anzahl der Antworten zu gering ist.

Ja, während des gesamten Semesters

Es wird keine Auswertung angezeigt, da die Anzahl der Antworten zu gering ist.

22. Wie informiert fühlen Sie sich über folgende Bereiche?

Studien- und Prüfungsordnung

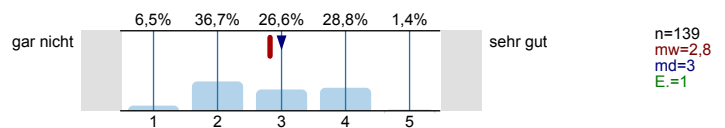

Möglichkeiten der Studienberatung

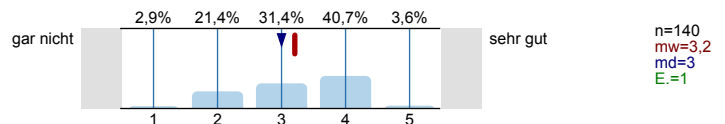

Einzelheiten des BAföG

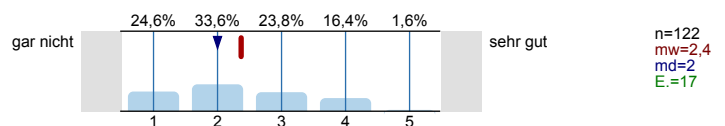

Möglichkeiten für ein Studium im Ausland

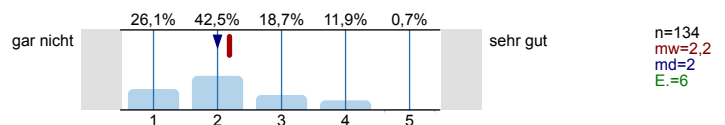

Arbeitsmarktsituation im angestrebten Tätigkeitsfeld

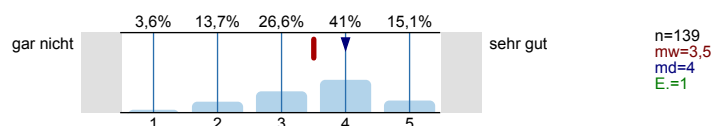

aktuelle politische Überlegungen der Hochschulentwicklung

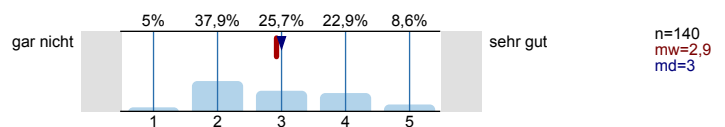

23. Wie schätzen Sie die zukünftig an Sie gestellten Studienanforderungen ein?

fachliches Niveau

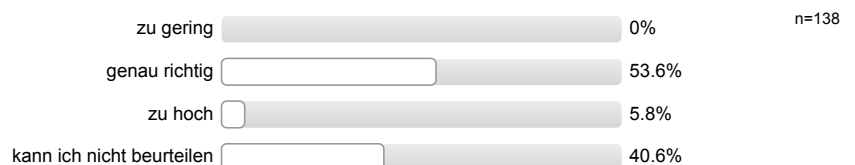

Umfang des Stoffes

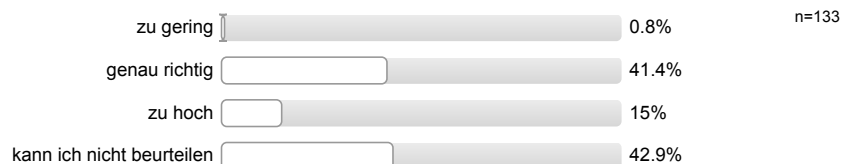

Zeitintensität (Gesamtaufwand Studium,

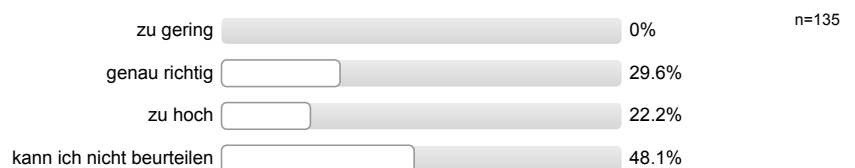

24. Wie wichtig sind Ihnen folgende Aspekte im Studium?

Abschluss des Studiums in der Regelstudienzeit

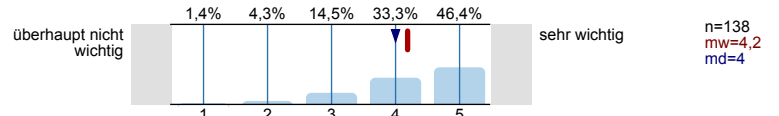

Bestehen des Studiums

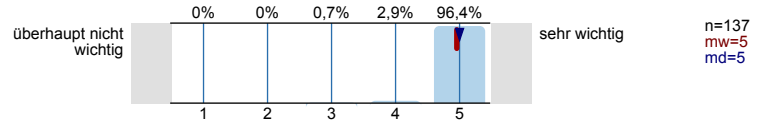

den eigenen Maßstäben gerecht werden

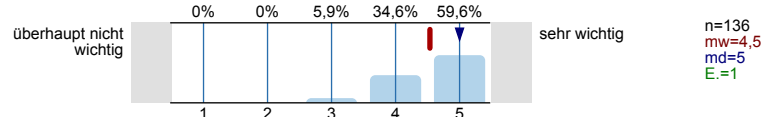

einen Bereich finden der Spaß macht

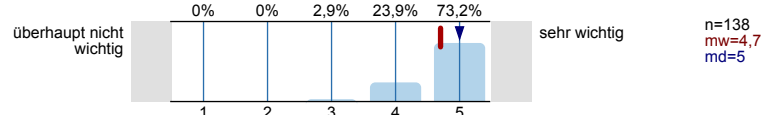

Promotionsthema bearbeiten mit dem Ziel, einen Dokortitel zu erlangen

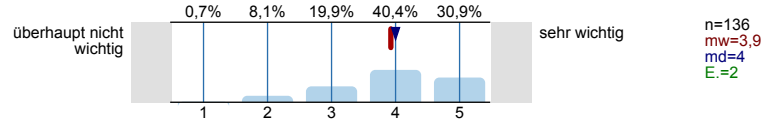

ein breites Allgemeinwissen aneignen

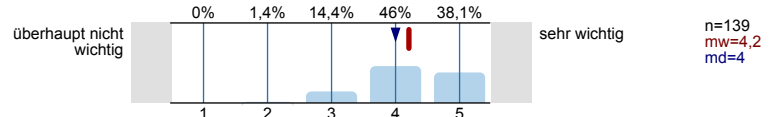

nachhaltiges Wissen erlangen

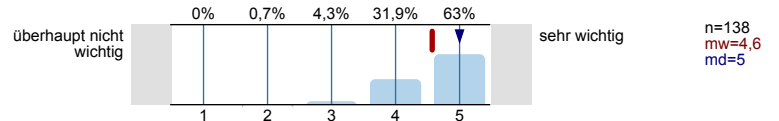

ein Leben" neben dem Studium "

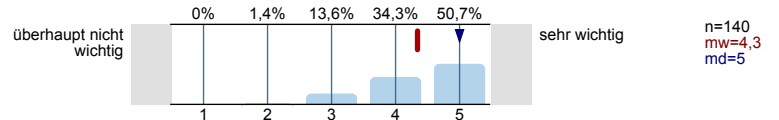

25. Aus Ihrer heutigen Sicht, in welcher Fachdisziplin möchten Sie tätig sein (Einfachnennung)?

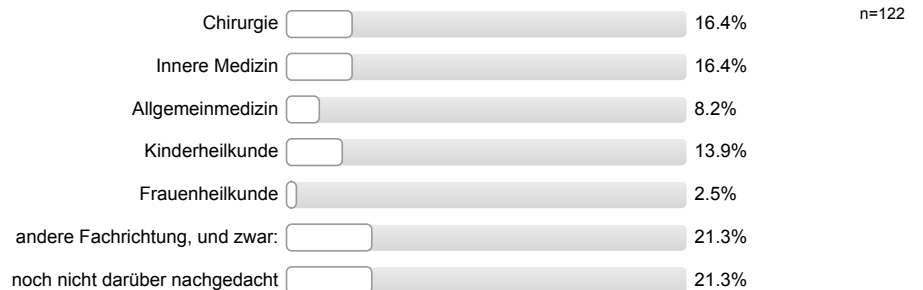

26. Wenn Sie sich jetzt für Ihre Zukunft entscheiden müssten, welche Richtung würden Sie wählen (Einfachnennung)?

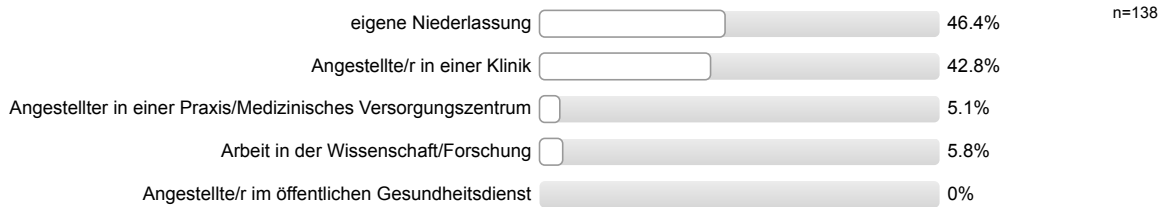

27. Wenn Sie sich für eine Niederlassung entscheiden würden. Welcher Bereich würde Ihnen mehr zusagen?

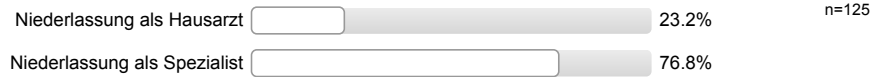

28. Wo würden Sie sich am ehesten niederlassen?

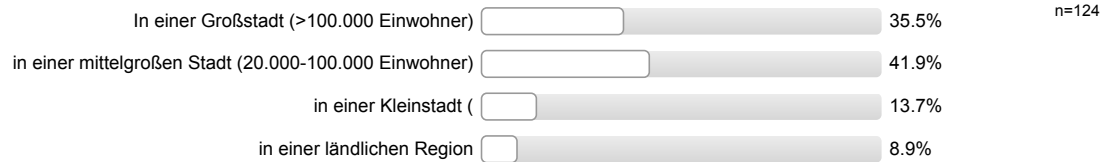

30. Nennen Sie uns bitte Ihr Geschlecht.

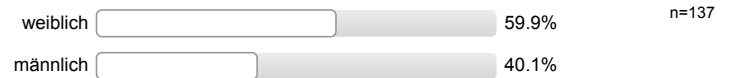

31. In welchem Jahr wurden Sie geboren?

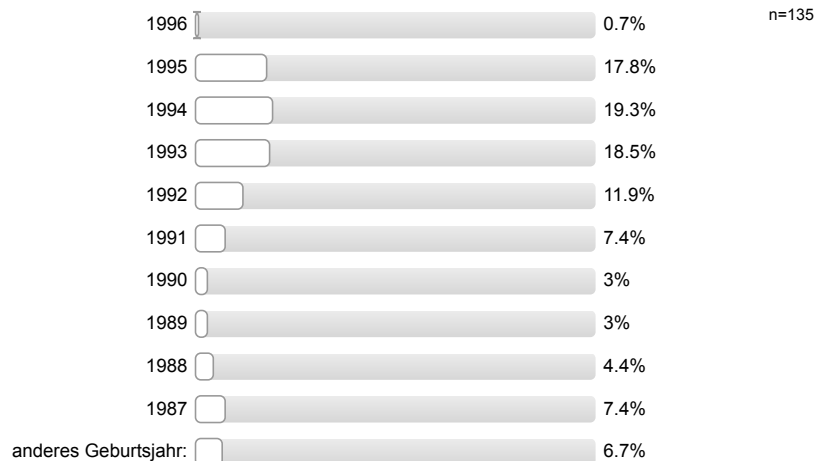

32. Welche Staatsangehörigkeit besitzen Sie?

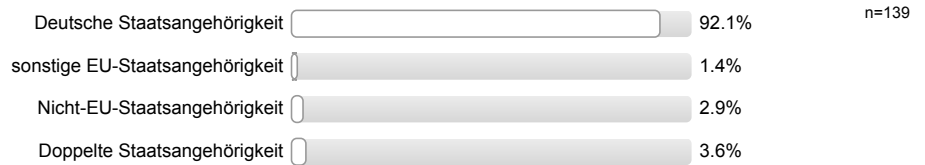

33. Bitte geben Sie Ihren Familienstand an.

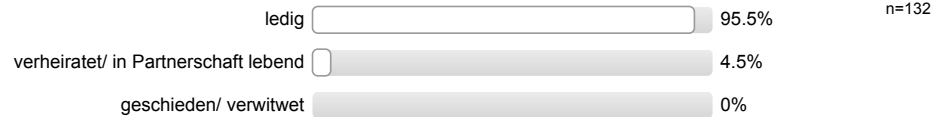

34. Wie viele Kinder haben Sie?

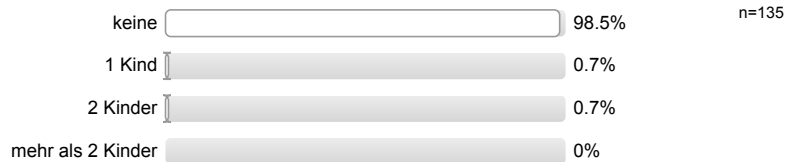

35. Nennen Sie uns bitte den höchsten berufsqualifizierenden Abschluss Ihrer Eltern.

Vater:

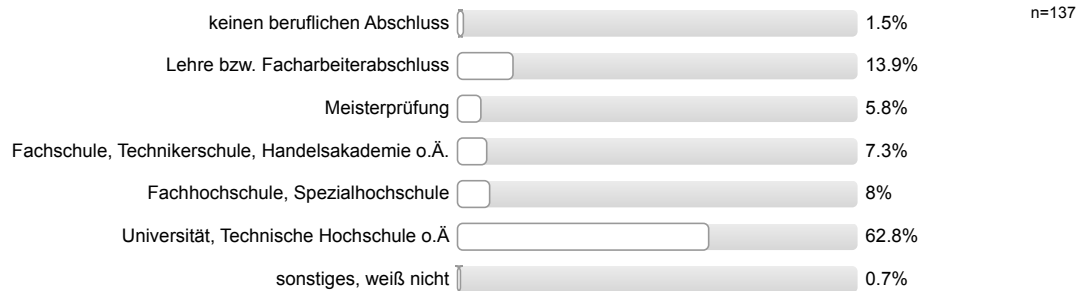

Mutter:

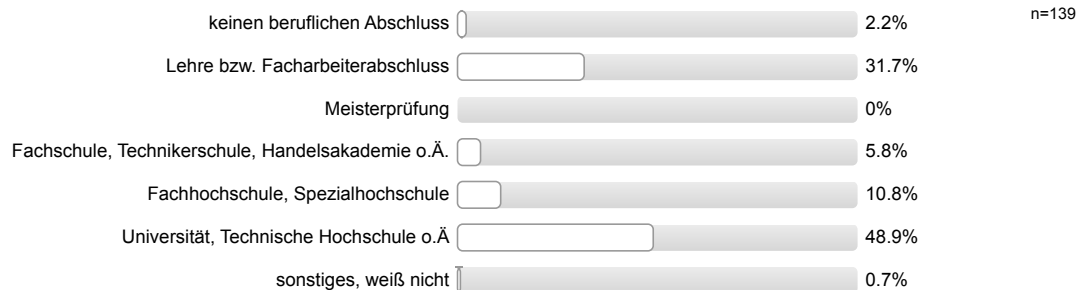

36. Sind Ihre Eltern im Gesundheitswesen tätig?

---

Vater:

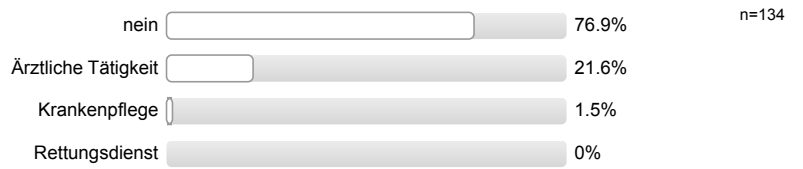

---

Mutter:

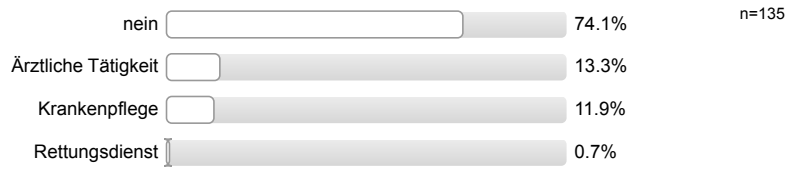

# Profillinie

Teilbereich: Medizinische Fakultät  
 Name der/des Lehrenden: Erstsemesterbefragung  
 Titel der Lehrveranstaltung: 2013  
 (Name der Umfrage)

Verwendete Werte in der Profillinie: Mittelwert

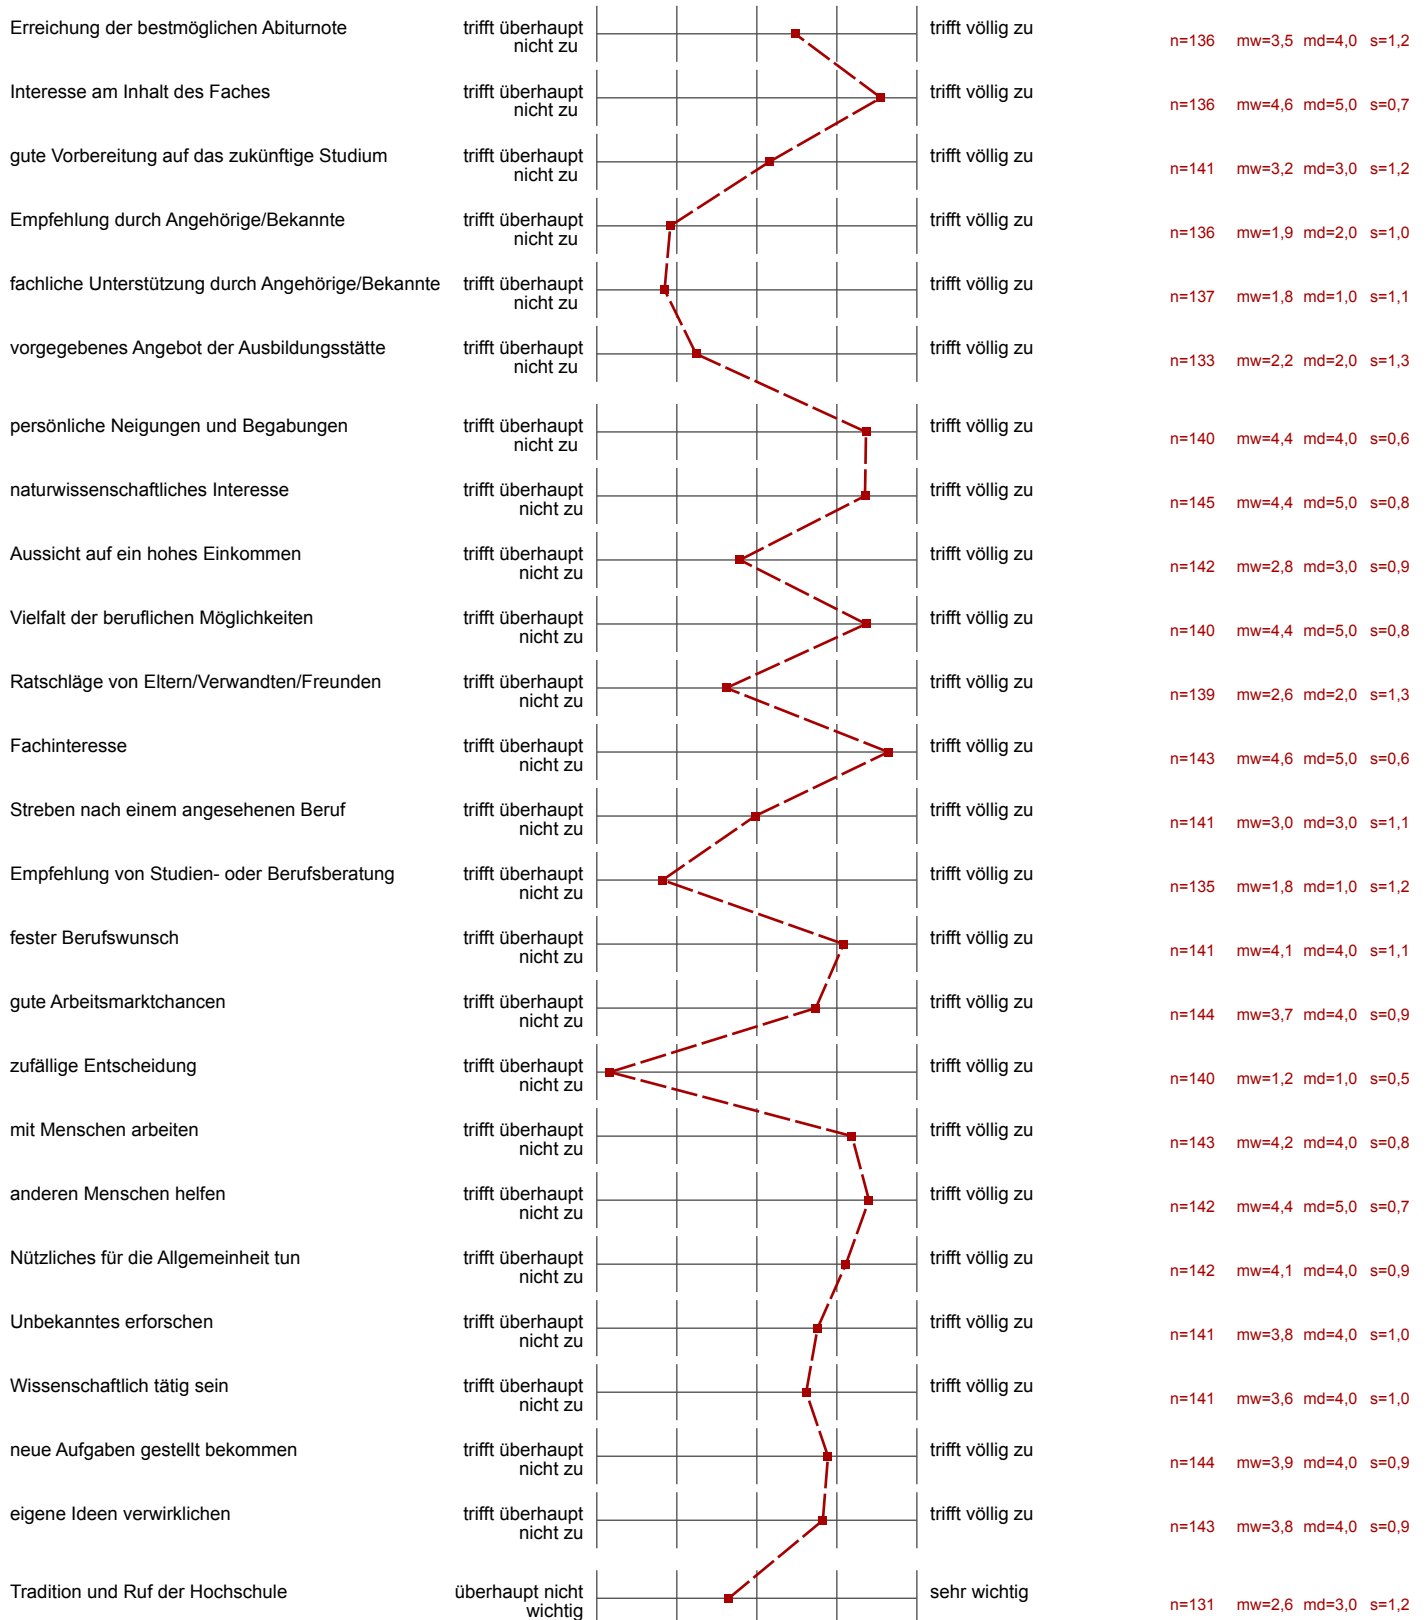



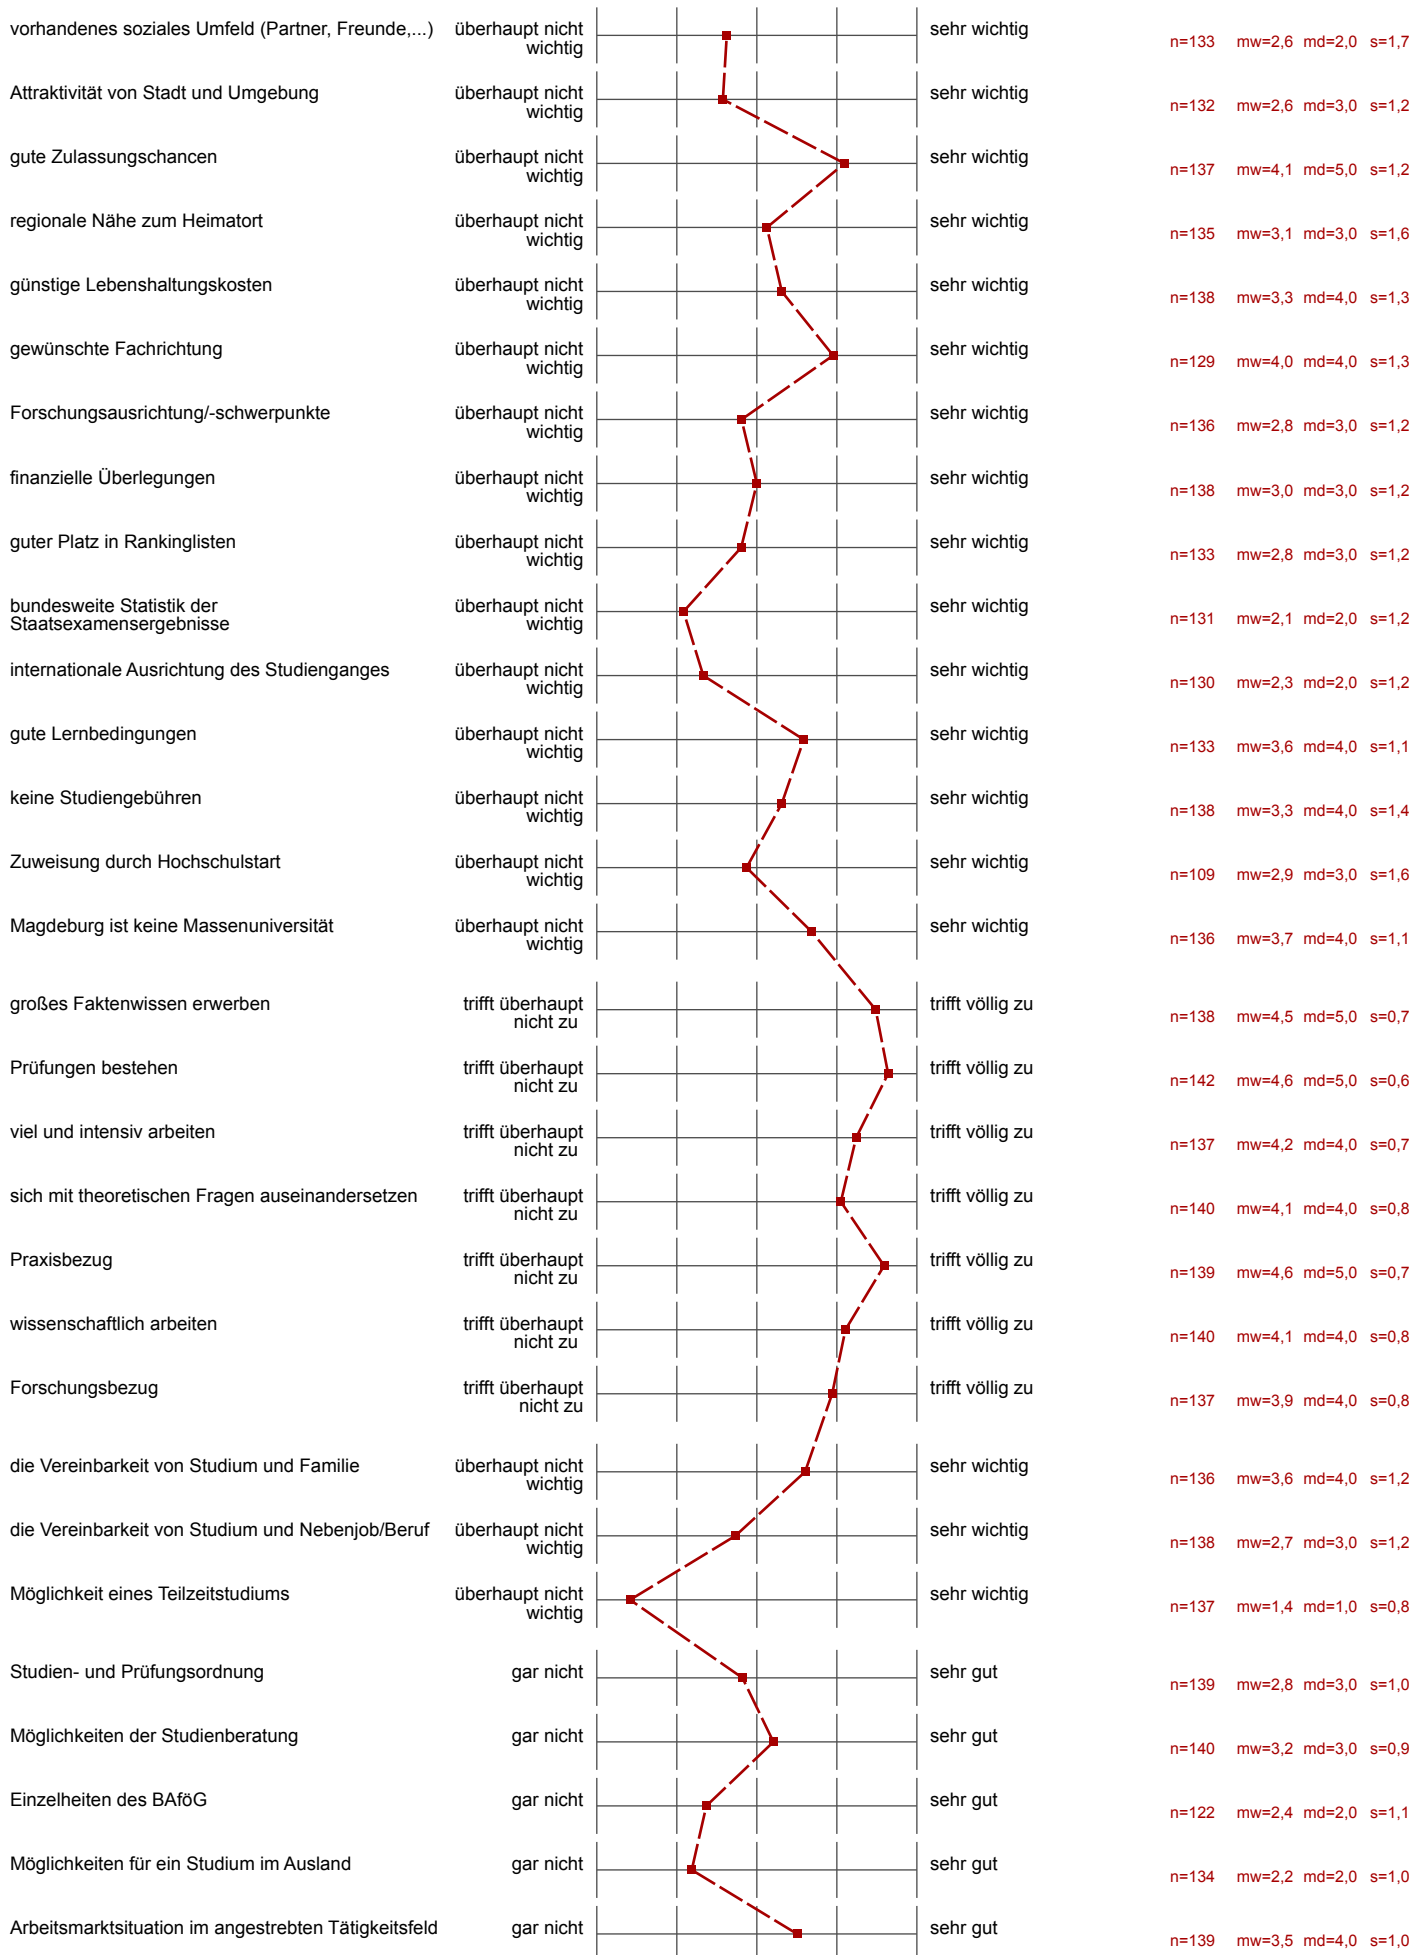

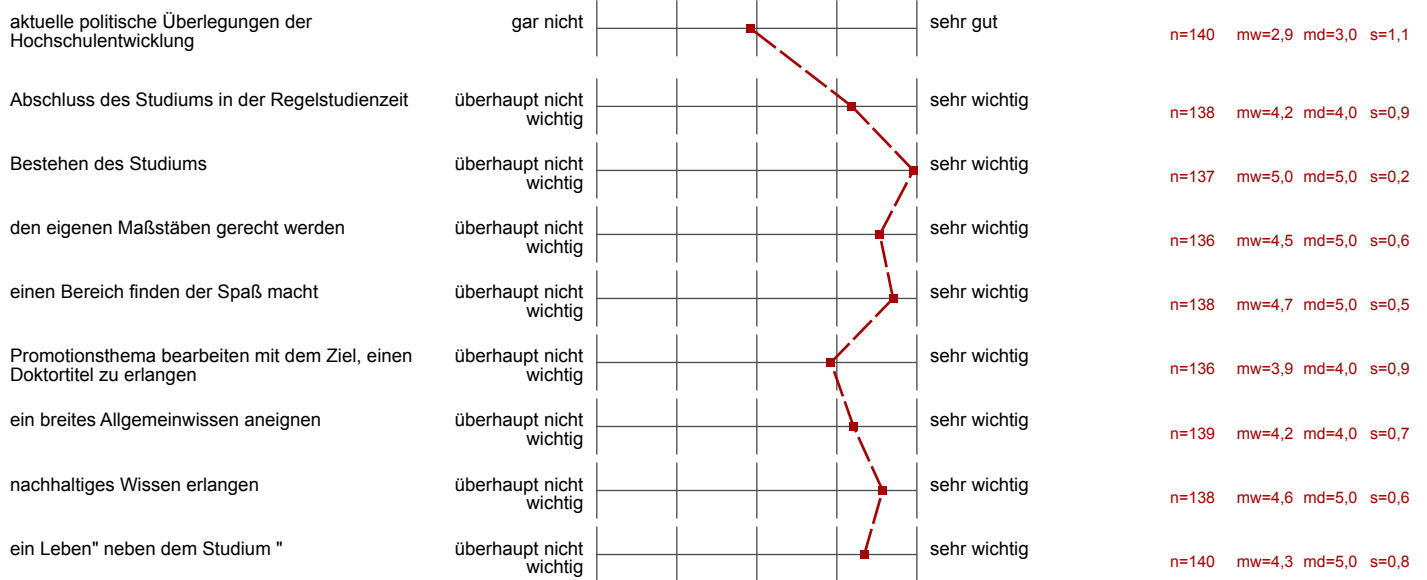

---

Auswertungsteil der offenen Fragen

1. In welchem Jahr haben Sie die Hochschulreife erworben?

5. In welchen Kursen haben Sie Ihre Hochschulreife abgelegt?

10. Was waren Ihre ersten drei Ortspräferenzen auf dem Zulassungsantrag der Quote, über die Sie zugelassen wurden?

14. Ist das Medizinstudium Ihr ursprüngliches Wunschfach?

17. Welche Informationsquellen haben Sie vor der Entscheidung für Magdeburg herangezogen?

25. Aus Ihrer heutigen Sicht, in welcher Fachdisziplin möchten Sie tätig sein (Einfachnennung)?

29. Jetzt würden wir gerne von Ihnen wissen, wo Sie sich selbst in 10 Jahren sehen.

31. In welchem Jahr wurden Sie geboren?

Matrikel-Nummer
